# Supplementary material for: Genome-Wide Identification of CsATGs in Tea Plant and the Involvement of CsATG8e in Nitrogen Utilization
Source: MDPI journal article supplement (doi:10.3390/ijms21197043), 2020-09-24
Supplement: s1 [file s1]

|                |                                 |                                |                                   |                                                        |     |        |  |  |  |
|----------------|---------------------------------|--------------------------------|-----------------------------------|--------------------------------------------------------|-----|--------|--|--|--|
| (a)            |                                 |                                |                                   |                                                        |     |        |  |  |  |
| <i>CsATG8e</i> | MAKSSFKSEHLERRQAEASRIE          | KYPRIPVIVEKAERSDIPIDKKKYL      | PADLTVGQFVYVVRRIKL                | --GAEKAIFFVKNTLPPTAAMMSAIYEENKDEGFLYMTYSGENTFGSI--     | 119 |        |  |  |  |
| <i>AtATG8a</i> | MAKSSFKINPLEARMSESSRIE          | KYPRIPVIVEKAGQSDVPIDKKKYL      | PADLTVGQFVYVVRRIKL                | --GAEKAIFFVKNTLPPTAAMMSAIYEENKDEGFLYMTYSGENTFGSLTV[ 1] | 122 | 85.25% |  |  |  |
| <i>AtATG8b</i> | MEKNSFKLNPLEMRMAESTIRIA         | KYPERVPVIVEKAGQSDVPIDKKKYL     | PADLTIGQFVYVVRRIKL                | --GAEKAIFFVKNTLPPTAAMMSAIYEENKDEGFLYMTYSGENTFGGSFY[ 1] | 122 | 79.51% |  |  |  |
| <i>AtATG8c</i> | MANSSFKLEHLERRQIESRIE           | KYPRIPVIVEKAERSDVPIDKKKYL      | PADLTVGQFVYVVRRIKL                | --SAEKAIFFVKNTLPPTAAMMSAIYEENKDEGFLYMTYSGENTFGLV--     | 119 | 89.08% |  |  |  |
| <i>AtATG8d</i> | MAISSFKHEHLERQAEASRIE           | KYPRIPVIVEKAERSDVPIDKKKYL      | PADLTVGQFVYVVRRIKL                | --SPEKAIFFVKNTLPPTAAMMSAIYEENKDEGFLYMTYSGENTFGIFF--    | 120 | 86.67% |  |  |  |
| <i>AtATG8e</i> | [114]LSELTFKSEIVAKLAREHVVVL[12] | KVDRIETLMNPKGLCCVTHVESKAVLA[5] | PGQVQVHDLRMVVKIFKAhdSAIACMTLTDGSL | LATASTKGTIRIFNAVDGTLQEFRRGVERAEIYN[120]                | 374 | 4.28%  |  |  |  |
| <i>AtATG8f</i> | MAKSSFKQEHDLKRRAEARIRE          | KYPRIPVIVEKAERSDIPIDKKKYL      | PADLTVGQFVYVVRRIKL                | --SAEKAIFFVDNVLPPAGALMSVYEEKDDGFLYVTYSGENTFGFGSP       | 121 | 80.99% |  |  |  |
| <i>AtATG8g</i> | MSNVSRQDHDFKRAEALRIE            | KYSDRPVIVEKESKSDIPIDKKKYL      | PADLTVGQFVYVVRRIKL                | --SAEKAIFFVDNVLPPGAMMSIYDENKDEGFLYVTYSGENTFGSSMT       | 121 | 76.03% |  |  |  |
| <i>AtATG8h</i> | [ 2]IVVSKFQDFSSDERLKESNNIIA     | KYPRIPVIVEKYSNADLPDMENKYL      | PRDMTVGHFIHMLSKRMQL               | --DPSKALFVFNHNTLPQTASRMDSLYNTFKEEDGFLYMCYSSEKTFG----   | 119 | 49.59% |  |  |  |
| <i>AtATG8i</i> | --MKSFKQYTLDERLAESREIIA         | KYPRIPVIAEKYKTDLPALAEKKFLV     | PRDMSVGQFIYILSARLHL               | --SPGKALFVFNHNTLPQTALMDSVYESYKDDGFLYMCYSSEKTFG----     | 115 | 52.10% |  |  |  |
| (b)            |                                 |                                |                                   |                                                        |     |        |  |  |  |
| <i>CsATG8e</i> | MAKSSFKSEHLERRQAEASRIE          | KYPRIPVIVEKAERSDIPIDKKKYL      | PADLTVGQFVYVVRRIKL                | GAEKA IFIFVKNTLPPTAAMMSAIYEENKDEGFLYMTYSGENTFGSI---    | 119 |        |  |  |  |
| <i>CsATG8a</i> | MAKSSFKLEHLERRQAEASRIE          | KYPRIPVIVEKAERSDIPIDKKKYL      | PADLTVGQFVYVVRRIKL                | SAEKA IFIFVKNTLPPTAAMMSAIYEENKDEGFLYMTYSGENTFGSL---    | 119 | 91.60% |  |  |  |
| <i>CsATG8b</i> | MAKSSFKLNPLEMRMAESTIRIA         | KYPERIPVIVEKERSDIPIDKKKYL      | PADLTVGQFVYVVRRIKL                | SAEKA IFIFVKNTLPPTAAMMSAIYEENKDEGFLYMTYSGENTFGSIQTQ[2] | 124 | 86.29% |  |  |  |
| <i>CsATG8c</i> | MAKSSFKLEHLERRQAEASRIE          | KYPRIPVIVEKAERSDIPIDKKKYL      | PADLTVGQFVYVVRRIKL                | SAEKA IFIFVKNTLPPTAAMMSAIYEENKDEGFLYMTYSGENTFGSF---    | 119 | 95.80% |  |  |  |
| <i>CsATG8d</i> | MAKSSFKHEHLERRQAEATRIE          | KYPRIPVIVEKADRCIPIDKKKYL       | PADLTVGQFVYVVRRIKL                | SPEKA IFIFVKNTLPPTAAMMSAIYEENKDEGFLYMTYSGENTFG----     | 117 | 89.92% |  |  |  |
| <i>CsATG8f</i> | [11]MTKIFYQEHDFKRAEASRIE        | KYSDRPVIVEKAERSDIPIDKKKYL      | PADLTVGQFVYVVRRIKL                | SAEKA IFIFVDNVLPTTGALMSIYDEKDEGFLYVTYSGENTFG-----      | 128 | 74.62% |  |  |  |
| <i>CsATG8g</i> | MAKSLFKQEHDLKRRAEAGRIE          | KYPRIPVIVEKAERSDIPIDKKKYL      | PADLTVGQFVYVVRRIKL                | SAEKA IFIFVDNVLPTTGSIMSIYDEKDEGFLYVTYSGENTFGTRFYC[2]   | 124 | 79.84% |  |  |  |
| <i>CsATG8h</i> | M--SSFKQEHDFKRAEASRIE           | KYPRIPVIVEKAERSDIPIDKKKYL      | PADLTVGQFVYVVRRIKL                | SAEKA IFIFVDNVLPTTGGIMSIYDEKDEGFLYVTYSGENTFGQLILH      | 120 | 77.05% |  |  |  |
| <i>CsATG8i</i> | M--SSFKQEHDFKRAEASRIE           | KYPRIPVIVEKAERSDIPIDKKKYL      | PADLTVGQFVYVVRRIKL                | SAEKA IFIFVDNVLPTTGGIMSIYDEKDEGFLYVTYSGENTFGQLILH      | 120 | 77.05% |  |  |  |
| <i>CsATG8j</i> | MAKSSFKQEHDLKRRAEAGRIE          | KYPRIPVIVEKAERSDIPIDKKKYL      | PADLTVGQFVYVVRRIKL                | SAEKA IFIFVDNVLPTTGGIMSIYDEKDEGFLYVTYSGENTFGDQILL      | 122 | 82.79% |  |  |  |
| <i>CsATG8k</i> | [ 5]----SFQKQFSEERSEESRDIK      | KYPRIPVIVEKYSNADLPDMENKYL      | PRDMSVGQFIHILSARLAPGA             | LFVFNHNTLPQTSSLMESYKTFKEEDGFLYMCYSSEKTFGCGNSQ[7]       | 130 | 45.38% |  |  |  |
| <i>CsATG8l</i> | [ 5]----SFQKQFSEERSEESRDIK      | KYPRIPVIVEKYSNADLPDMENKYL      | PRDMSVGQFIHILSARLAPGA             | LFVFNHNTLPQTSSLMESYKTFKEEDGFLYMCYSSEKTFGCGNSQ[7]       | 130 | 45.38% |  |  |  |

**Figure S1.** Amino acid sequence alignment of *CsATG8e* and ATG8 members in *Arabidopsis* and tea plant. (a) Comparison between *CsATG8e* and ATG8 members in *Arabidopsis*. (b) Comparison between *CsATG8e* and ATG8 members in tea plant. The number on the right is the identity with *CsATG8e* of the corresponding gene on the left side in one role.

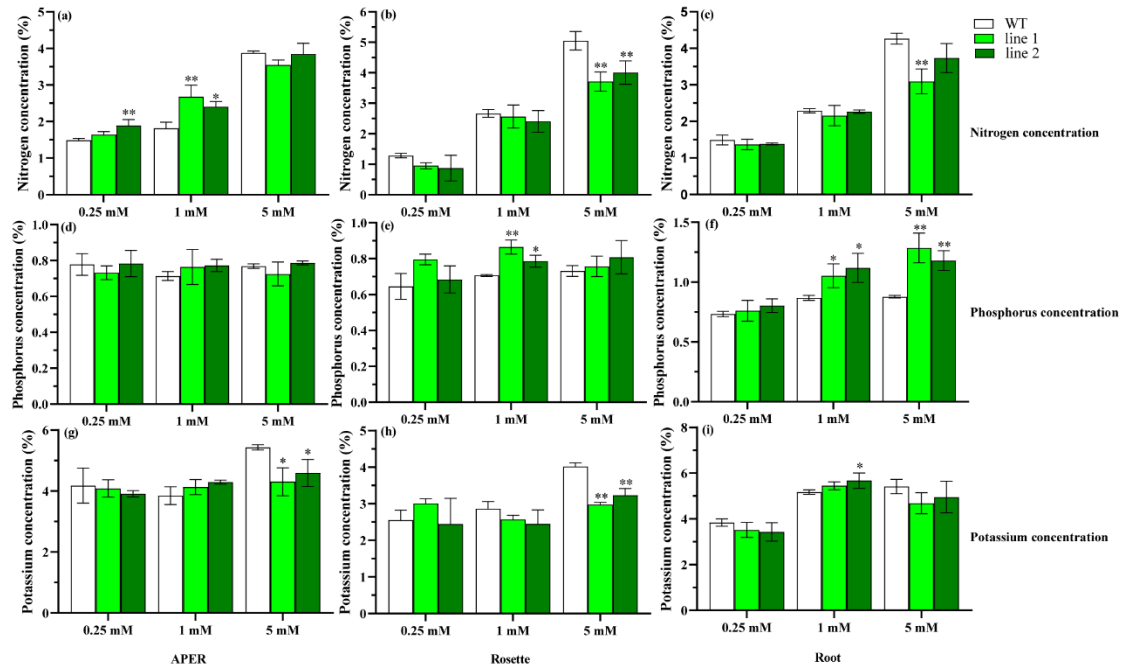

**Figure S2.** The concentration of N, P and K in overexpression *Arabidopsis* (OE) and wild type (WT) under three N regimes. (a-c) N concentration in aerial part excluding rosette (APER), rosettes (Rosette) and roots (Root) of OE and WT under 0.25 mM, 1 mM and 5 mM N treatments. (d-f) P concentration for APER, Rosette, and Root of OE and WT under 0.25 mM, 1 mM and 5 mM N treatments. (g-i) K concentration for APER, Rosette and Root of OE and WT under 0.25 mM, 1 mM and 5 mM N treatments. 0.25 mM N, 0.125 mM  $\text{NH}_4\text{NO}_3$ ; 1 mM N, 0.50 mM  $\text{NH}_4\text{NO}_3$ ; 5 mM N, 2.50 mM  $\text{NH}_4\text{NO}_3$ . Values are means  $\pm$  standard (SD) ( $n = 4$ ). Asterisks indicate significant difference between WT and two OE lines (line1, line2). \*  $p < 0.05$ ; \*\*  $p < 0.01$  ( $t$ -test).

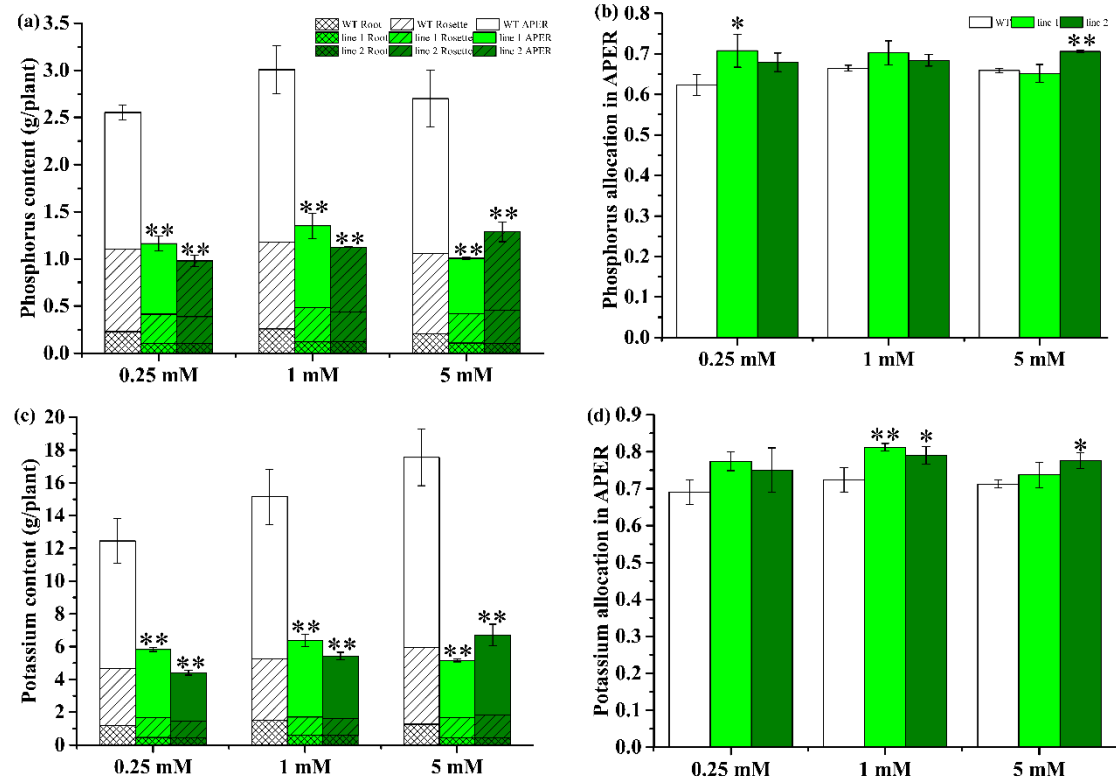

**Figure S3.** Analysis of P and K content and allocation in overexpression *Arabidopsis* (OE) and wild type (WT). (a) and (c) The composition of P and K in OE lines and WT. (b) and (d) The N and K allocation in aerial part excluding rosette (APER). Values are means  $\pm$  standard (SD) ( $n = 4$ ). Asterisks indicate significant difference between WT and two OE lines (line1, line2). \*  $p < 0.05$ ; \*\*  $p < 0.01$  ( $t$ -test).
