# Supplementary material for: Genome-Wide Identification of CsATGs in Tea Plant and the Involvement of CsATG8e in Nitrogen Utilization
Source: Int J Mol Sci. 2020 Sep 24;21(19):7043. doi: 10.3390/ijms21197043 (PMC7583067; doi:10.3390/ijms21197043)
Supplement: Supplementary file 1 [file ijms-21-07043-s001.zip › Supplmentary Table.xlsx]

## Sheet: Supplementary Table 1
Supplementary Table 1. The sequence characteristics of CsATG genes in tea plant
Subfamily	Number	ATG proteins	Locus ID	Genomic(bp)	ORF(bp)	Protein size(aa)	MW (kDa)1	PI2
CsATG1	5	CsATG1a	CSS0006404.1	1989	318	105	12.3092	7.94
		CsATG1b	CSS0044531.1	375	297	98	11.1188	6.9
		CsATG1c	CSS0001934.1	8030	1461	486	55.0212	9.81
		CsATG1d	CSS0039644.1	2014	528	175	19.4857	5.68
		CsATG1e	CSS0042370.1	4941	1551	516	57.2926	5.45
CsATG2	1	CsATG2	CSS0011349.1	14775	5994	1997	218.684	5.74
CsATG3	2	CsATG3a	CSS0045715.1	15899	942	313	35.5809	4.64
		CsATG3b	CSS0046772.1	9835	945	314	35.7201	4.72
CsATG4	3	CsATG4a	CSS0048139.1	7485	1473	490	54.1886	5.54
		CsATG4b	CSS0004368.1	3808	1383	460	51.1533	5.41
		CsATG4c	CSS0003826.1	6289	1473	490	54.1586	5.54
CsATG5	1	CsATG5	CSS0031022.1	20937	1140	379	42.6075	4.77
CsATG6	1	CsATG6	CSS0011474.1	11763	1548	515	58.7638	6.31
CsATG7	3	CsATG7a	CSS0045323.1	6129	2112	703	77.5824	5.73
		CsATG7b	CSS0049485.1	6463	2121	706	77.9877	5.68
		CsATG7c	CSS0029481.1	7127	1959	652	73.0854	5.4
CsATG8	12	CsATG8a	CSS0047563.1	4521	360	119	13.6438	8.75
		CsATG8b	CSS0012169.1	5013	375	124	14.2684	7.87
		CsATG8c	CSS0049783.1	3324	360	119	13.7069	8.78
		CsATG8d	CSS0028585.1	5339	354	117	13.6388	6.6
		CsATG8e	CSS0008568.1	3126	360	119	13.6478	8.78
		CsATG8f	CSS0029668.1	5643	387	128	14.9833	8.71
		CsATG8g	CSS0035066.1	3409	375	124	14.3576	8.92
		CsATG8h	CSS0033839.1	3862	363	120	13.87	7.9
		CsATG8i	CSS0035192.1	3934	363	120	13.87	7.9
		CsATG8j	CSS0028099.1	3335	369	122	13.9952	8.75
		CsATG8k	CSS0013524.1	4103	393	130	14.9582	7.58
		CsATG8l	CSS0023716.1	4083	393	130	14.9582	7.58
CsATG9	2	CsATG9a	CSS0019197.1	9775	2610	869	99.9027	6.31
		CsATG9b	CSS0024912.1	880	444	147	17.2317	9.67
CsATG10	1	CsATG10	CSS0005940.1	5335	633	210	24.0754	5.96
CsATG11	1	CsATG11	CSS0046771.1	39472	3306	1101	124.597	5.65
CsATG12	2	CsATG12a	CSS0011852.1	3355	285	94	10.5082	9.41
		CsATG12b	CSS0028385.1	3841	219	72	8.21069	9.43
CsATG13	1	CsATG13	CSS0024224.1	14315	1863	620	68.7531	8.9
CsATG14	2	CsATG14a	CSS0003227.1	6743	1305	434	48.6375	9.16
		CsATG14b	CSS0006833.1	11984	1440	479	53.8138	8.92
CsATG16	8	CsATG16a	CSS0041467.1	31333	2886	961	107.704	8.82
		CsATG16b	CSS0006108.1	4563	1455	484	53.5495	8.46
		CsATG16c	CSS0036222.1	4572	1422	473	52.1549	8.16
		CsATG16d	CSS0028462.1	21798	1542	513	58.0614	7.02
		CsATG16e	CSS0029758.1	7682	1026	341	37.7258	6.55
		CsATG16f	CSS0020323.1	1068	1068	355	39.2947	7.12
		CsATG16g	CSS0022544.1	1822	1791	596	67.6138	6.22
		CsATG16h	CSS0037916.1	11312	1431	476	52.8452	9.15
CsATG18	18	CsATG18a	CSS0016079.1	2317	1011	336	37.2878	9.89
		CsATG18b	CSS0018567.1	25612	1107	368	40.329	8.09
		CsATG18c	CSS0012069.1	6942	1176	391	43.1433	8.5
		CsATG18d	CSS0018737.1	3626	1254	417	46.3483	6.97
		CsATG18e	CSS0049303.1	15948	1260	419	46.1982	6.62
		CsATG18f	CSS0026650.2	6560	2697	898	97.0831	8.64
		CsATG18g	CSS0021708.1	8760	2814	937	102.043	8.06
		CsATG18h	CSS0039456.1	11147	3069	1022	111.889	5.79
		CsATG18i	CSS0024395.1	3943	978	325	35.8721	8.45
		CsATG18j	CSS0027759.1	5410	1137	378	41.8475	8.72
		CsATG18k	CSS0017985.1	7095	1317	438	48.2925	5.73
		CsATG18l	CSS0018126.1	3597	1227	408	45.2126	7.54
		CsATG18m	CSS0041525.1	1925	489	162	18.2063	9.1
		CsATG18n	CSS0005880.1	15074	900	299	32.8175	6.82
		CsATG18o	CSS0010177.1	6605	2694	897	96.9999	8.47
		CsATG18p	CSS0042691.2	11027	2988	995	108.704	5.81
		CsATG18q	CSS0040351.1	3171	1815	604	65.7742	6.62
		CsATG18r	CSS0016690.1	3165	1869	622	67.6703	6.62
CsATG20	4	CsATG20a	CSS0032993.2	17175	1194	397	45.6493	6.59
		CsATG20b	CSS0047631.1	29710	1191	396	45.4871	6.55
		CsATG20c	CSS0005836.1	10493	1206	401	46.1547	8.2
		CsATG20d	CSS0048654.1	13509	1206	401	46.1547	8.2
CsATG101	1	CsATG101	CSS0024932.1	6752	657	218	25.4032	6.26
CsVPS15	2	CsVPS15a	CSS0000434.1	12734	4632	1543	172.181	6.19
		CsVPS15b	CSS0026223.1	12459	4632	1543	172.153	6.19
CsVPS34	1	CsVPS34	CSS0036353.2	18228	2295	764	87.2955	6.58
CsVPS35	4	CsVPS35a	CSS0042556.1	11915	2385	794	89.9585	5.25
		CsVPS35b	CSS0032290.1	16729	2523	840	94.4475	5.51
		CsVPS35c	CSS0017701.1	19390	2373	790	89.4101	5.37
		CsVPS35d	CSS0029031.1	22188	2373	790	89.4101	5.37
CsATI	1	CsATI	CSS0032978.3	5130	948	315	35.0014	4.52
CsNBR1	1	CsNBR1	CSS0041144.1	5806	2550	849	92.9238	5.24
CsVTI12	3	CsVTI12a	CSS0037762.1	612	612	203	23.1004	8.63
		CsVTI12b	CSS0046310.1	612	612	203	23.1284	8.63
		CsVTI12c	CSS0042754.1	3849	669	222	25.2602	9.22
			min	375	219	72	8.21069	4.52
			max	39472	5994	1997	218.684	9.89
1 The Molecular weight of proteins (kDa);
2 The isoelectric point;

## Sheet: Supplementary Table 2
Supplementary Table 2. Molecular evolutionary rate of duplicated CsATG pairs in tea plant
Paralogous pairs	Ka	Ks	Ka/Ks	Purifying selection
CsATG1a/CsATG1c	0.149787	0.332508	0.450476	Yes
CsATG3a/CsATG3b	0.0118181	0.332511	0.035542	Yes
CsATG7a/CsATG7b	0.00933428	0.0185195	0.504026	Yes
CsATG8a/CsATG8b	0.040877	0.38002	0.107565	Yes
CsATG8b/CsATG8c	0.0523251	1.09147	0.0479402	Yes
CsATG8c/CsATG8e	0.0182491	0.30567	0.059702	Yes
CsATG8f/CsATG8h	0.0305192	0.468438	0.0651508	Yes
CsATG8f/CsATG8g	0.0375313	1.45623	0.025773	Yes
CsATG8g/CsATG8h	0.0712145	1.83021	0.0389107	Yes
CsATG8i/CsATG8h	0	0	NaN1
CsATG8j/CsATG8g	0.0471027	0.533053	0.0883641	Yes
CsATG16b/CsATG16c	0.00946239	0.0114886	0.823633	Yes
CsATG18a/CsATG18k	0.151821	0.705838	0.215094	Yes
CsATG18d/CsATG18i	0.120257	0.60421	0.199032	Yes
CsATG18d/CsATG18k	0.21096	1.66156	0.126965	Yes
CsATG18g/CsATG18h	0.314146	0.918964	0.341848	Yes
CsATG18g/CsATG18p	0.0872096	0.318409	0.273891	Yes
CsATG18g/CsATG18q	0.255127	0.841894	0.30304	Yes
CsATG18h/CsATG18q	0.11462	0.29473	0.388896	Yes
CsATG18i/CsATG18k	0.195112	1.02291	0.190743	Yes
CsATG18q/CsATG18r	0.0170546	0.0138893	1.2279	No
CsVPS15a/CsVPS15b	0.000565451	0.00275567	0.205196	Yes
CsVPS35a/CsVPS35d	0.0427339	0.290617	0.147046	Yes
CsVPS35a/CsVPS35b	0.105978	1.06998	0.0990468	Yes
CsVPS35b/CsVPS35d	0.108695	1.05653	0.102879	Yes
1Ka/Ks can't be caculated since the value of Ks is zero.

## Sheet: Supplementary Table 3
Supplementary Table 3. ATG domains for AtATGs in Arabidopsis thaliana
Gene	Domains
AtATG1a	STKc_ATG1_ULK_like
AtATG1b	STKc_ATG1_ULK_like
AtATG1c	STKc_ATG1_ULK_like
AtATG1d	STKc_ATG1_ULK_like
AtATG2	ATG_C, Chorein_N
AtATG3	Autophagy_N, Autophagy_act_C, Autophagy_C
AtATG4a	Peptidase_C54
AtATG4b	Peptidase_C54
AtATG5	APG5
AtATG6	APG6, APG6_N
AtATG7	E1_like_apg7
AtATG8a	Ubl_ATG8
AtATG8b	Ubl_ATG8
AtATG8c	Ubl_ATG8
AtATG8d	Ubl_ATG8
AtATG8e	WD40 superfamily
AtATG8f	Ubl_ATG8
AtATG8g	Ubl_ATG8
AtATG8h	Atg8
AtATG8i	Atg8
AtATG9	APG9
AtATG10	Autophagy_act_C
AtATG11	ATG11, APG17 superfamily
AtATG12a	Ubl_ATG12
AtATG12b	Ubl_ATG12
AtATG13a	ATG13
AtATG13b	ATG13
AtATG14a	Atg14
AtATG14b	Atg14
AtATG16	WD40, ATG16 superfamily
AtATG18a	WD40 superfamily
AtATG18b	WD40 superfamily
AtATG18c	WD40 superfamily
AtATG18d	WD40 superfamily
AtATG18e	WD40 superfamily
AtATG18f	BCAS3, WD40 superfamily
AtATG18g	BCAS3, WD40
AtATG18h	BCAS3, WD40 superfamily
AtATG20	PX_SNX1_2_like, BAR_SNX
AtATG101	ATG101
AtVPS15	STKc_Vps15, WD40 superfamily
AtVPS34	PI3Kc_III, PI3Ka_III, C2_PI3K_class_III
AtVPS35A	Vps35
AtVPS35B	Vps35
AtVPS35C	Vps35
AtVTI12	V-SNARE, SNARE_Vti1
AtNBR1	NBR1_like, PB1_Joka2, ZZ superfamily, UBA_NBR1
AtATI1	-
AtATI2	-
"-", represents no domain found.

## Sheet: Supplementary Table 4
Supplementary Table 4. List of genes and protein sequences used in this study
Gene	ID Number	Amino acid sequence
Arabidopsis thaliana1
AtATG1a	At1g49180	MMMLDDYIAKSKLSESLTSTVWLAKHKLTGEEAVMKCFDLSKLNRNLRDCLNNELEFLSSVDHPNIIRLLHVSQDDDFLVMVLEYCDGGTLSSYIQRYGRVEEDIAKRFMKQIGAGLEIIHDNHIIHRDLKPENILIDGSGDDLVLKIADFSLARKLHPGKYLETVCGSPFYMAPEVLQFQRYNEKADMWSVGAILFELLHGYPPFRGNNNVQVLRNIKSSTALPFSRLILQQMHPDCIDVCSRLLSINPAATLGIEDFPFLGRIKNSRVWVKDTTFSSRQHGTRERKVATINGRLQFDLSQDAYLPQRLLENLMYIYNTIEMARVTGVPTSYLISRGESIKVLSQLLRKAKQKTWFFQMLRSWNLNKELMKVQLYVGGFISPTYSFTYSSITSNILIN…
AtATG1b	At2g37840	MAQFTGRVVGDYLVGRQIGSGSFSVVWEARHRVDGTEVAIKEIAMDRLNKKLQESLMSEIFILRRINHPNIIRLIDMIKSPGKVHLVLEYCKGGDLSVYVQRHGIVPEATAKHFMQQLAAGLQVLRDNNIIHRDLKPQNLLLSTNENDADLKIADFGFARSLQPRGLAETLCGSPLYMAPEIMQLQKYDAKADLWSVGAILFQLVTGRTPFTGNSQIQLLQNIIRSTELHFPGDCRDLSLDCIDLCQKLLRRNPVERLTFEEFFNHPFLSDRQSYDFSRSRLGLRTMDGFLSSGSSPSRNMEESSQEDCLPFLLDDDSSGPEGSPSYLKKTSSMKSSSGIKVDTRIERKEVESSPLKHTELTSGYSSFNQKVENDRFRFETQINSDRRNRREPTGLTDS…
AtATG1c	At3g53930	MAQSSLVAAAGRSGRVIGDYAVGRQIGSGSFSVVWEGRHLVHGTVVAIKEIAMARLNKKLQESLMSEIIILRKINHPNIIRFIDMIEAPGKINLVLEYCKGGDLSMYIHKHGSVPEATAKHFMLQLAAGLQVLRDNNIIHRDLKPQNLLLSTDDNDAALKIADFGFARSLQPRGLAETLCGSPLYMAPEIMQLQKYDAKADLWSVGAILFQLVTGRTPFTGNSQIQLLQNIIRSTELHFPADCRDLSTDCKDLCQKLLRRNPVERLTFEEFFHHPFLSDKQSYDFTRSRLDSRTMNDFHSSGSSPSRNIEEISQEDGLPFFLDDDSSGPEGSPSSFKHTSPMKSSYGFSVERREAALSPLKNMDLSSRYSRVSHRAETNNFKFEGHRLSDRSQFKPSSL…
AtATG1d	At3g61960	MESARLVGDYALGPRIGSGSFAVVWLAKHRSSGLEVAVKEIDKKLLSPKVRDNLLKEISILSTIDHPNIIRFYEAIETGDRIFLVLEYCSGGDLAGYINRHGKVPEAVAKHFMRQLALGLQVLQEKHFIHRDLKPQNLLLSSKEVTPLLKIGDFGFARSLTPESMAETFCGSPLYMAPEIIRNQKYDAKADLWSAGAILFQLVTGKPPFDGNNHIQLFHNIVRDTELKFPEDTRNEIHPDCVDLCRSLLRRNPIERLTFREFFNHMFLREPRQIPDVEHSGFSTCTGKSLLPSAQPSTSTNRFKSSAENVHKHGSSSSASNSQISMPHTSFEKTRKDTEGQCSSNQSGVVDSLELIEREYVLVNRPSASLEGSSDCFDTSLQDSGFPNILPRNEKVSSS…
AtATG2	At3g19190	MVFPWNIAKSAEEAFSRWAVKRVVKFLLKKKLGKLILGDIDLDQLDIQLRDGTIQLSDLAINVDYLNDKFDAPLVIKEGSIGSLLVKMPWKTNGCQVEVDELELVLAPRLESNKSSSNEASTSASTREDLHNIRLEIGKHENEMLMNAAKSASIDVHEGVKTVAKIVKWFLTSFHVKIKNLIIAFDPDFGKKQSEAGPRPTLVLRMTEIECGISEEQVSANEVSPDNFLGINRLANCVKFQGAVVELLNMDDDDDGDKTCDKKTSNDVTLIMTGVGGGFSGSLNFSIPWKNGSLDIRKVDADISIDPVEVRFQPSTIRWFLQLWKTFTSFGSDCFPSVSHSDFLTDSPTIPTNVMVTPPATLSLSGGQELEHDTTPNLQFIPDWFPSSFSKKEEDGEVD…
AtATG3	At5g61500	MVLSQKLHEAFKGTVERITGPRTISAFKEKGVLSVSEFVLAGDNLVSKCPTWSWESGDASKRKPYLPSDKQFLITRNVPCLRRAASVAEDYEAAGGEVLVDDEDNDGWLATHGKPKDKGKEEDNLPSMDALDINEKNTIQSIPTYFGGEEDDDIPDMEEFDEADNVVENDPATLQSTYLVAHEPDDDNILRTRTYDLSITYDKYYQTPRVWLTGYDESRMLLQPELVMEDVSQDHARKTVTIEDHPHLPGKHASVHPCRHGAVMKKIIDVLMSRGVEPEVDKYLFLFLKFMASVIPTIEYDYTMDFDLGSSST
AtATG4a	At2g44140	MKALCDRFVPQQCSSSSKSDTHDKSPLVSDSGPSDNKSKFTLWSNVFTSSSSVSQPYRESSTSGHKQVCTTRNGWTAFVKRVSMASGAIRRFQERVLGPNRTGLPSTTSDVWLLGVCYKISADENSGETDTGTVLAALQLDFSSKILMTYRKGFEPFRDTTYTSDVNWGCMIRSSQMLFAQALLFHRLGRAWTKKSELPEQEYLETLEPFGDSEPSAFSIHNLIIAGASYGLAAGSWVGPYAICRAWESLACKKRKQTDSKNQTLPMAVHIVSGSEDGERGGAPILCIEDATKSCLEFSKGQSEWTPIILLVPLVLGLDSVNPRYIPSLVATFTFPQSVGILGGKPGASTYIVGVQEDKGFYLDPHEVQQVVTVNKETPDVDTSSYHCNVLRYVPLESL…
AtATG4b	At3g59950	MKAICDRFVPSKCSSSSTSEKRDISSPTSLVSDSASSDNKSNLTLCSDVVASSSPVSQLCREASTSGHNPVCTTHSSWTVILKTASMASGAIRRFQDRVLGPSRTGISSSTSEIWLLGVCYKISEGESSEEADAGRVLAAFRQDFSSLILMTYRRGFEPIGDTTYTSDVNWGCMLRSGQMLFAQALLFQRLGRSWRKKDSEPADEKYLEILELFGDTEASAFSIHNLILAGESYGLAAGSWVGPYAVCRSWESLARKNKEETDDKHKSFSMAVHIVSGSEDGERGGAPILCIEDVTKTCLEFSEGETEWPPILLLVPLVLGLDRVNPRYIPSLIATFTFPQSLGILGGKPGASTYIVGVQEDKGFYLDPHDVQQVVTVKKENQDVDTSSYHCNTLRYVP…
AtATG5	At5g17290	MAKEAVKYVWEGAIPLQIHLHKSDVASHPAPPPALVLAPRIGYLPLLIPLIKPYFKDSLPPGEDSIWFDYKGFPLKWYIPTGVLFDLLCAEPERPWNLTIHFRGYPCNILIPCEGEDSVKWNFVNSLKEAQYIINGNCKNVMNMSQSDQEDLWTSVMNGDLDAYTRLSPKLKMGTVEDEFSRKTSLSSPQSQQVVPETEVAGQVKTARIPVRLYVRSLNKDFENLEDVPEIDTWDDISYLNRPVEFLKEEGKCFTLRDAIKSLLPEFMGDRAQTSGEERSIDDTEEADGSREMGEIKLVRIQGIEMKLEIPFSWVVNNLMNPEFYLHISVLVKAPQR
AtATG6	At3g61710	MRKEEIPDKSRTIPIDPNLPKWVCQNCHHSLTIVGVDSYAGKFFNDPPPSATQGSSIHGANSVLGSTRMDNSFVVLPRHKPPQSQGIPPRPRGASSPQPDATQSGKAMEESFVVVYKSEPVSDSGGSHNLSLEVGQNGPLHSNTSGFNATINVLTRAFDIARTQTQVEQPLCLECMRVLSDKLEKEVEDVTRDVEAYEACVQRLEGETQDVLSEADFLKEKKKIEEEERKLVAAIEETEKQNAEVNHQLKELEFKGNRFNELEDRYWQEFNNFQFQLIAHQEERDAILAKIEVSQAHLELLNKTNVLIDAFPIRNDGEFGTINNFRLGRLPAIKVEWDEINAAWGQACLLLHTMCNYFRPKFQCQVKIQPMGSYPRIVDSNNETYELFGPVNLFWSTRY…
AtATG7	At5g45900	MAEKETPAIILQFAPLNSSVDEGFWHSFSSLKLDKLGIDDSPISITGFYGPCGHPQVSNHLTLLSESLPLDEQSLIASTSHGNRNKCPVPGILYNTNTVESFNKLDKQSLLKAEANKIWEDIQSGKALEDPSVLPRFLVISFADLKKWSFRYWFAFPAFVLDPPVSLIELKPASEYFSSEEAESVSAACNDWRDSDLTTDVPFFLVSVSSDSKASIRHLKDLEACQGDHQKLLFGFYDPCHLPSNPGWPLRNYLALIRSRWNLETVWFFCYRESRGFADLNLSLVGQASITLSSGESAETVPNSVGWELNKGKRVPRSISLANSMDPTRLAVSAVDLNLKLMRWRALPSLNLNVLSSVKCLLLGAGTLGCQVARTLMGWGIRNITFVDYGKVAMSNPVR…
AtATG8a	At4g21980	MAKSSFKISNPLEARMSESSRIREKYPDRIPVIVEKAGQSDVPDIDKKKYLVPADLTVGQFVYVVRKRIKLGAEKAIFVFVKNTLPPTAALMSAIYEEHKDEDGFLYMTYSGENTFGSLTVA
AtATG8b	At4g04620	MEKNSFKLSNPLEMRMAESTRIRAKYPERVPVIVEKAGQSDVPDIDKKKYLVPADLTIGQFVYVVRKRIKLGAEKAIFVFVKNTLPPTAALMSAIYEEHKDEDGFLYMTYSGENTFGGSFYC
AtATG8c	At1g62040	MANSSFKLEHPLERRQIESSRIREKYPDRIPVIVERAERSDVPNIDKKKYLVPADLTVGQFVYVVRKRIKLSAEKAIFVFVKNTLPPTAAMMSAIYDENKDEDGFLYMTYSGENTFGLV
AtATG8d	At2g05630	MAISSFKHEHPLEKRQAEAARIREKYPDRIPVIVERAEKSDVPDIDRKKYLVPADLTVGQFVYVVRKRIKLSPEKAIFIFVKNILPPTAAIMSAIYEEHKDEDGFLYMSYSGENTFGIFF
AtATG8e	At5g05150	MNSIVSTVRGILTLSRSETFDSPRDEAKSDLKVLSVAWNQVCSGFIVGTNHGFNVYSCKPMIKKSISRAPHESGFKVAEMLFLSNLFAFVGNGYNNSEYPPNKVFVWDDYRNCCLSELTFKSEVIAVKLAREHVVVVLKQNIYVYTFNNLKVDRVIETLMNPKGLCCVTHVESKAVLACPGFHPGQVQVHDLRWNVIKFIKAHDSAIACMTLTLDGSLLATASTKGTLIRIFNAVDGTLLQEFRRGVERAEIYNVAISSNLKWVAASSEKGTLHVFRLRPDILSFDPASSSSFIRVILPKYLYENERSFAQFSLPASTKFIVGFGSENTVLLVGIDGSFRRCKFDHADGGQMVELEHKYFFSLQETGNTMVGGV
AtATG8f	At4g16520	MAKSSFKQEHDLEKRRAEAARIREKYPDRIPVIVEKAEKSDIPTIDKKKYLVPADLTVGQFVYVIRKRIKLSAEKAIFIFVDNVLPPAGALMSSVYEEKKDDDGFLYVTYSGENTFGFGSP
AtATG8g	At3g60640	MSNVSFRQDHDFEKRKAEALRIREKYSDRVPVIVEKSEKSDIPNIDKKKYLVPADLTVGQFVYVIRKRIQLSAEKAIFIFVDNVLPPTGAMMSTIYDENKEEDGFLYVTYSGENTFGSSMT
AtATG8h	At3g06420	MGIVVKSFKDQFSSDERLKESNNIIAKYPDRIPVIIEKYSNADLPDMEKNKYLVPRDMTVGHFIHMLSKRMQLDPSKALFVFVHNTLPQTASRMDSLYNTFKEEDGFLYMCYSTEKTFG
AtATG8i	At3g15580	MKSFKEQYTLDERLAESREIIAKYPTRIPVIAEKYCKTDLPAIEKKKFLVPRDMSVGQFIYILSARLHLSPGKALFVFVNNTLPQTAALMDSVYESYKDDDGFVYMCYSSEKTFG
AtATG9	At2g31260	MMSSGHKGPNVRNFFKWQRGESSSSLTTGLLHNESHEIELSNYGGIPSPGSESPSGLLNGESLNVQPIADLDLFVERLYSYYRDKGLWCIIVKWAVELLSLGFIICFSGFFLLYVDWNGLQNAKCGMDAVESGTKPCDLVKEAIHPHPLSPFTLTTAIIVGYLALFSVYWLFCFLRFFAQLKDTLDFRHFYYNNLHVTDNEILTMPWATVLEKVVQLQSSQCLCVVKDLSAHDMVMRLMRKENYLIGMLNKGLLSFPISHWIPGAGPAVKSAPDGTQYHLVLTKTLEWTLNWCILQSMFDCNFRVRRDFVSNPTTLKKRLFVVGLAMLLLSPFLVIFMLVYLFLRHAEQFYNHPSTASSRRWSNLSKWLFREFNEVDHLFKHRINSSVVHASEYLKQFP…
AtATG10	At3g07525	MDSAREVSDGRLTVEGFSVASRAFADKWKIHNQSFPPWSWVPLINRTLLVSKKEEGYLSLEKIIILSSLEEEIPEDESLNVATDCLEKEETVDHTILVPTMENEAHYYDFHIVYSASYKVPVLYFRGYCSGGEPLALDVIKKDVPSCSVSLLLESKWTFITQEEHPYLNRPWFKLHPCGTEDWIKLLSQSSSSSGCQMPIVLYLVSWFSVVGQVVGLRIPLEMLN
AtATG11	AT4G30790	MSGSFTESFADDGKLLLCVAENGHSFEFQCSETTSVESVMRFVESVSGIALSDQLLLSLDMKLEPQKLLSAFGLPASDREVFVFNKAMLQSNSHPPSPEDVDLQDVADALPPASLHEHHPLDDASDPALKALPLYERQFRYHFHKGRTIYNCTVVKHENCERLTREQKVQQRAVEVATRNLEQYYRVIYQNFLEFMKRYKHQHRLHSDLLMNFGRDIEKLRSAKIHPYLQTESRKCLLDFVKEDNLKKAVENCASSHRQFENKIAQFQQMFVEVKRKVEELFACRASLSMKNLEVTVKDHERFIDEEKSIMQSLSKDVNTVKKLVDDCMSSQVSSSLRPHDAVSALGPMYEVHDKNHLPKMQACYNSISELLDFCKNKKNEMNNFVHGYMQKITYVTYI…
AtATG12a	At1g54210	MATESSSPSSVRKVVVHLRATGGAPILKQSKFKIPGTDKFAKVIDFLRRQLHSDSLFVYVNSAFSPNPDESVIDLYNNFGFDGKLVVNYACSMAWG
AtATG12b	At3g13970	MATESPNSVQKIVVHLRATGGAPILKQSKFKVSGSDKFANVIDFLRRQLHSDSLFVYVNSAFSPNPDESVIDLYNNFGFDGKLVVNYACSMAWG
AtATG13a	At3g18770	MSSSHNRSNNNNSEGAKAEQIIFEFFAKSLHIILESRTPFMSSRNFSGEQMICSPSSSSSSSSSVRPRDKWFNLALRECPAALESFDIGRRSSLEPLVVDVVLVVRPLVGDQSGKRELIRNFSGKDYQSGWNSDQDELGCETKNEQIIERWVVQYDNRKIRESVTTSSRRSSSNKLQVMYKKATLLLRSLFVMVRLLPAYKIFRELNSSGQIFKFKLVPRVPSIVEPFTRKEEAEMQKFSFTPVETICGRLCLSVLYRSLSDVSCEHSTPMSPTFITDYVGSPLADPLKRFPSLPLSYGSPPLLPFQRRHSWSFDRYKASPPSVSCSPSPTRSDSHALVSHPCSRHLPPHPSDIPTGRRKESYPEEYSPCQDFSPPPSPSAPKHAVPRGITRTESAPVR…
AtATG13b	At3g49590	MDFPENLPSDIGRLEQIVSHFFPKALHIVLNSRIPSLQSRGRTRERLSGLNVRKSDKWFNLVMGDRPAALEKLHSWHRNILDSMIIDIILVHPISNDNLDDDDDHSDSVVRSAETVIERWVVQYENPLIMSPQSSDSATRYQKVYKKSIILLRSLYAQTRLLPAYRVSRQLSSSLASSGYDLIYKVSSFSDIFSGPVTETMKEFRFAPVEVPPGRLCASVTYRSDLSDFNLGAHITLPPRIITDYVGSPATDPMRFFPSPGRSVEGHSFTGRAGRPPLTGSSAERPHSWTSGFHRPPAQFATPNQSFSPAQSHQLSPGLHDFHWSRTDAFGDNHQLSPPFSPSGSPSTPRYISGGNSPRINVRPGTAPVTIPSSATLNRYVSSNFSEPGRNPLPPFSPK…
AtATG14a	AT1G77890	MEKSTKCAVCYKSFRPSICVDCVNRGLNEYKVKLDSLKSLREVSYFRLSGLLVTKEKAISQRCWKELQNEKLAKLREKLQLQVEKLQQSKNTFRSLSRNLKERYGIIESTNVALEESRVHQLENHYSDTIGNHYLVYIDLTSERLYKQALVMKQICKLFPLSRVTVEGQNKDGSSVQYDQICNALLPQGLNPLSVPPKELAASLGYMVQLLNLVVHKLSVPALHNLGFAGSCSRIWERDSYWNSYPSSPSNGYPLFVPIHDHYSFEEKSSWTGRDTTNFGVTSLKSDGSIEEDYHDLDLDVVSLSSASPHSVETFRNLQQGIAHLKQSVAHLTVYGYRSLSLEVPSGTSTFETFAKLLATLSSLKEVQSGLSLGLSSSNKQRHEPNKSVWNLNSSSSST…
AtATG14b	AT4G08540	MTKRSSNCAICDNTNRPCICTACVNHRLIEYNTLLKSLKTRRDSLLSRFNELLESKGKADDQKNWRLIQNEKISKLKKKLKSNKELVTQGKVKIERGSSDLKVKYGVLDSARSTLEKTRVEQVEKYFPNLICTQSLGHMAISSERLHKQSVVVKQICKLFPLRRVSFDGESQNGSVRQYDVICNSRLPSGLDPHSIPSEELAVSLGYMVQLLNLVVHNLAAPALHSSGFAGSCSRIWQRDSYWDGRTSTRSNEYPLFIPRRNYCSTSVENSWTDKNSSNFGVASMESDRKEPRLDSPGSNSFKYSSASPHSIESHRDLQKGIALLKKSVACLTAYCYNSLCLEVPPEASTFEAFAKLLATLSSSKEVRSVFSLKMASSRSGKQAQQLNKSIWNAHSVIS…
AtATG16	At5g50230	MVQEEKAMEAINDALRALRKRHLLEEGAHAPAISALSKPLISQGSEWKEKTEKLETELQQCYKAQSRLSEQLVIEVAESRTSKAILQEKELLINDLQKELTQRREDCTRLQEELEEKTKTVDVLIAENLEIRSQLEEMTSRVQKAETENKMLIDRWMLQKMQDAERLNEANDLYEEMLAKLKANGLETLARQQVDGIVRRNEDGTDHFVESTIPSTCANRIHAHEGGCGSIVFEYNSGTLFTGGQDRAVKMWDTNSGTLIKSLYGSLGNILDMAVTHDNKSVIAATSSNNLFVWDVSSGRVRHTLTGHTDKVCAVDVSKFSSRHVVSAAYDRTIKLWDLHKGYCTNTVLFTSNCNAICLSIDGLTVFSGHMDGNLRLWDIQTGKLLSEVAGHSSAVTSV…
AtATG18a	At3g62770	MATVSSSSWPNPNPNPDSTSASDSDSTFPSHRDRVDEPDSLDSFSSMSLNSDEPNQTSNQSPLSPPTPNLPVMPPPSVLHLSFNQDHACFAVGTDRGFRILNCDPFREIFRRDFDRGGGVAVVEMLFRCNILALVGGGPDPQYPPNKVMIWDDHQGRCIGELSFRSDVRSVRLRRDRIIVVLEQKIFVYNFSDLKLMHQIETIANPKGLCAVSQGVGSMVLVCPGLQKGQVRIEHYASKRTKFVMAHDSRIACFALTQDGHLLATASSKGTLVRIFNTVDGTLRQEVRRGADRAEIYSLAFSSNAQWLAVSSDKGTVHVFGLKVNSGSQVKDSSRIAPDATPSSPSSSLSLFKGVLPRYFSSEWSVAQFRLVEGTQYIAAFGHQKNTVVILGMDGSFYR…
AtATG18b	At4g30510	MLYSSDLLAIVGAGEQASLSPRRLCLFKTTTGLPLRELNFLTSILAVRMNKKRLVVVLLEKTFVYDLNTLVMLDTIDTVPNPKGLSAFSPSLEGCYLAVPASTTKGSVLVYNVMDLQSHSEIDAHRSPLAAIALSSNGMYIATGSEQGTLIRVHLVSEATKSYSFRRGTYPSTIYSLSFGPSTQLPDILIATSSSGSIHAFSLSLAINQRSKRSTSFLGSVLPDSVSDALDPAHHHVLQNAVSSGIRSYAVVRKIDKLEGTSSPSHFTSLRATVSVITYNGYFQEYTLSINNKNESLWTLEREFNLFSITTG
AtATG18c	At2g40810	MSSTVSNPQGILQPGSFLLPESESMKKEEAELVSVCWNQDSSCFAAGTSHGFRIYNCEPFKETFRRELKDGGFKIVEMLFRSNILALVGGGPNSQYPSSKVLIWDDHQSRCISEFAFRSEIRAVKLRRDRIVVVLEHKIYVYNFMDLRLLHQIETQANPRGLCCLSHHSNTSVLACPGLNRGEIRVEHFGLNMVQIINAHDSSIACMTLTLDGLLLATASTKGTLIRIFNTMDGTRLQEVRRGVDRADIYSIALSPNVQWLAVSSDKGTVHIFSLRVRVVGEDSYSTENGALLTQQNYSNSLQGLVSPTIGTNPGSSLSFMRGVLPKYFSSEWSYAQFHVSEVTQFFAAFGSNNTVAIIGMDGSFYRCSFDPVNGGEMGQLEYIHFMKMDNRP
AtATG18d	At3g56440	MDPRRNFQPGGYDSRNTFTSGSFGPPDFGESDEAELVSVSWNQDYSCFAAGTSHGFRIYNCEPFKETFRRELKDGGFKIVEMLFRSNILALVGGGPNSQYPSNKVLIWDDHQGRCISEFTFRSEIRAVKLRRDRIVVVLEHKIYVYNFMDLRLLHQIENMANPRGLCCLSHHMNTSVLACPGIRRGEVRVEHFGLNMVQIINAHDSNIACMTLTLDGLLLATASTKGTLIRIFNTMDGTRLQEVRRGVDRADIYSIALSPNVQWLAVSSDKGTVHIFSLRVRVIGEDAYSTEHETSSNSLQPLVSPASGANPGSSLSFLRGVLPKYFSSEWSFSQFHVPEVTQYFAAFGAQNTIAIIGLDGSFYRCNFDPVNGGEMTQLEHFHFLKQDSPR
AtATG18e	At5g05150	MNSIVSTVRGILTLSRSETFDSPRDEAKSDLKVLSVAWNQVCSGFIVGTNHGFNVYSCKPMIKKSISRAPHESGFKVAEMLFLSNLFAFVGNGYNNSEYPPNKVFVWDDYRNCCLSELTFKSEVIAVKLAREHVVVVLKQNIYVYTFNNLKVDRVIETLMNPKGLCCVTHVESKAVLACPGFHPGQVQVHDLRWNVIKFIKAHDSAIACMTLTLDGSLLATASTKGTLIRIFNAVDGTLLQEFRRGVERAEIYNVAISSNLKWVAASSEKGTLHVFRLRPDILSFDPASSSSFIRVILPKYLYENERSFAQFSLPASTKFIVGFGSENTVLLVGIDGSFRRCKFDHADGGQMVELEHKYFFSLQETGNTMVGGV
AtATG18f	At5g54730	MKKNGDGSSPKSPDGVVSRSARSSFRALSNCLKVISSGASTVARSAVSAASSAVESHHDQVLWAGFDNLQKEDGDTRRVLLLAFKSGFQVWDVEDTENVHVIVSAHDGQAFFMQMLLNPINSGVLDDRFYKSRPLLAVCGDYSSKKISSDNPGSETVATPTNVYVYSLKSQSYVHTLKFRATIYSVRCCSRIVAVLQAAQIDCFDAATLEMDYRIVTNSIVCGSLGVGYGPLAVGPRWIAYSGSRIATSSSAIFTSEIVSLSTSSPSVAQFARDSSKQLASGIANLGDKGYRSLTKYCSEVLPNPYIPGLKGIGVGNEKVADAESIGMVIVKDITNKSVITQFKAHKSPISALCFDQSGLLLVTASIQGHNINVFRIMPTISTSRAVKTTTFAHLFRLQ…
AtATG18g	At1g03380	MMKKGKGKNSGLLPNSFKIISSCLKTVSANATNVASSVRSAGASVAASISAAEDDKDQVTWAGFGILELGQHVTRHVLLLGYQNGFQVFDVEDASNFNELVSKRGGPVSFLQMQPLPARSGDHEGFWNSHPLLLVVAGDETNGTGLGHSFSQNGSLARDGSSDSKAGDAINYPTTVRFYSLRSHSYVYVLRFRSSVCMIRCSSRVVAVGLANQIYCVDALTLENKFSVLTYPVPQPVRQGTTRVNVGYGPMAVGPRWLAYASKSSMTMKTGRLSPQTFTSSPSLSPSSSSGGSSFMARYAMESSKQLANGLINLGDMGYKTLSKYCQDMLPDGSTSPASPNAIWKVGGVSGSDAENAGMVAVKDLVSGALVSQFKAHTSPISALCFDPSGTLLVTASVC…
AtATG18h	At1g54710	MKSNSKVNINNNGDNHNQTKNNGTNGFLPNSLKFISTCIRTASSGVRSASASVAASLSSDSHELKDQVLWSSFDRLHTSESSFKNVLLLGYTNGFQVLDIDDSNDVTEFVSRRDDPVTFLQMQPLPAKCDGVEGFRSSHPILLAVADEAKGSGPIVTSRDGSVRNGYEDPLALSPTVVRFYSLRSHNYVHVLRFRSTVYMVRCSPRIVAVGLGSQIYCFDALTLENKFSVLSYPVPQLGNQGISGVNVGYGPMAVGARWLAYASNSPLSSSIGRLSPQNVTPPGVSPSTSPNNGNLVARYAMESSKHLAAGLLNLGDKGYKTISKYCQDLKHDGPGPSLSSSPGRKVGRVGSHSAESDVVGTVIVKDFESRAIIAQFRAHTSPISALCFDPSGTLLVTA…
AtATG20	At5g06140	MESTEQPRNISGSMQSPRSPSSHPYLSVSVTDPVKLGNGVQAYISYRVITKTNLPEYQGPEKIVIRRYSDFVWLRDRLFEKYKGIFIPPLPEKSAVEKFRFSAEFIEMRRAALDIFVNRIALHPELQQSEDLRTFLQADEETMDRFRFQETSIFKKPADLMQMFRDVQSKVSDAVLGKEKPVEETTADYEKLKHYIFELENHLTEAQKHAYRLVKRHRELGQSLLDFGKAVKLLGACEGEPTGKAFSDLGTKSELLSIKLQKEAQQVLMNFEEPLKDYVRYVQSIKATIAERGTAFKQHCELSETTKLKEINLDKLMLTRSDKVGEAEIEYREIKAESEEATRRFERIVKRMEDEIVRFQEQKTEEMGVAFHQFAKGQARLANSVADAWRSLLPKLEAS…
AtATG101	AT5G66930	MMKQAYEKVSPNPPKTIGEKKGESVSCKFQQGRSEEILEKSENSLTREVESFEIREVLRCILHTIVFHRALGLIRPKDIDLELFEITYVQCGEIEVEKKIDEKIEQFINWIEKHPNKKSQICLSFYEVKSKQPSWFTKIERLYWEQWYINLNVLQPTKPPVGKSHHSKLVMDPGEASEERSSRRTLLEQSLQEVLFQIIKFVNEKKDHVPPINDGVIYYPFEITIPSSSDSAFGMDMFKRILHSGHPSMLG
AtVTI12	At1g26670	MSDVFEGYERQYCELSTNLSRKCHSASVLSNGEEKKGKIAEIKSGIDEADVLIRKMDLEARSLQPSAKAVCLSKLREYKSDLNQLKKEFKRVSSADAKPSSREELMESGMADLHAVSADQRGRLAMSVERLDQSSDRIRESRRLMLETEEVGISIVQDLSQQRQTLLHAHNKLHGVDDAIDKSKKVLTAMSRRMTRNKWIITSVIVALVLAIILIISYKLSH
AtNBR1	AT4G24690	MESTANALVVKVSYGGVLRRFRVPVKANGQLDLEMAGLKEKIAALFNLSADAELSLTYSDEDGDVVALVDDNDLFDVTNQRLKFLKINVNAGVSTNSAAPESSGSSTPAGMPNPVSKIQKGINDVLMAVPNPMRDTISKVYMDLASKASTSSPVVGEMLDCISKLGQLSIPQESSPCSPVTKPGSSGASLSRDVPSAGGKKDISERTQTGRKPVNLNEPTGAHSKTSGHVPNSSGLGANFNECPFSGSTMNYSCPNPVNLNKHPRRVCHSKKSTNGDYWTSLGVFHKGIRCDGCGVLPITGPRFKSKVKEDYDLCTICYSVMGNEGDYTRMDKPVSVQHLHPFRGPFTQFPNPWLSHPVPRATNGGAPLRCTRPKLDSRFVLDVNVIDGTVVAPSAPFT…
AtATI1	AT2G45980	MANNEEHPPRGNEWEVVSLTSSAYAAAPGPYNVESRDVRKYDAYYGAETSRDLYMSEHFVFPPSEHENLPIDESLFVAEQRKDGRDLMLEGQGLSDQFHYEAGNNQQSIYGESALGSSRHMESFGSESAVYEHGLVDAEGNLDLHSDGEGEKDVKKSTHNLPCEAWWKRRAISMYSRTREANAIWSLFFAAAVTGLVVLGQRWQQERWQVLQLKWQSSISSEKLGRVLEPLSRLKDVIVRSNPQASLVRSGSSSEV
AtATI2	AT4G00355	MADKDEAATRGNDWEVVSLTASAYAAAPGPKPVVDSKDDDHKEVTPCYEAETSHPLYMSRHFVFPPTGQLENTSDLTEASLTGSHCKEGSDLSLKGLDLSDDFGGLEFSEDKGKKEENIYTTAMSSLDDERAIGGSHVYEPVEEPTEPVSPSDVTLDLNPIKDDEVANSPPSEEAWWKRSVASLIAQAKETNTVWSICIAAAVMGIVILGQHWQQERWQILQQKWESSIGNEKAGRLMGPISRLKQAFVGGQRRDSFIRASAQNDR
AtVPS15	At4g29380	MGNKIARTTQVSATEYYLHDLPSSYNLVLKEVLGRGRFLKSIQCKHDEGLVVVKVYFKRGDSIDLREYERRLVKIKDVFLSLEHPHVWPFQFWQETDKAAYLVRQYFYSNLHDRLSTRPFLSLVEKKWLAFQLLLAVKQCHEKDICHGDIKCENVLLTSWNWLYLADFASFKPTYIPYDDPSDFSFFFDTRGQRLCYLAPERFYEHGGETQVAQDAPLKPSMDIFAVGCVIAELFLEGQPLFELAQLLAYRRGQHDPSQHLEKIPDPGIRKMILHMIQLEPEARLSAEDYLQNYVGVVFPNYFSPFLHTLYCCWNPLPSDMRVATCQGIFQEILKKMMENKSGDEIGVDSPVTSNPMNASTVQETFANHKLNSSKDLIRNTVNSKDEIFYSISDALKKN…
AtVPS34	At1g60490	MGANEFRFFLSCDINSPVTFRIEKLDGNLPVKKSSDSGVVSIAEEKKPELYIECALYIDGAPFGLPMRTRLKTTGPPYCWNELITLSSKYRDLTAHSQLAITVWDVSCGKTEGLIGGATVLLFNSKMQMKSGKQKLRLWQGKEADGSFPTSTPGKVPRHERGELERLEKLMNKYERGQIQSIDWLDRLMLKSLDTIKEQESTKHGSSHLFVVIDFCSFEHRVVFQESGANLFITAPIGSTNEFVTVWDTELGKTNPSENKQLKLARSLDRGIIDRDLKPSNIERKSIQRVLKYPPTRTLSGDERQLLWKFRFSLMSEKRALTKFLRCVEWSDVQEAKQAIQLMYKWEMIDVCDALELLSPLFESEEVRAYAVSVLERADDEELQCYLLQLVQALRFERS…
AtVPS35A	AT2G17790	MIADGSEDEEKWLAAGAAAFKQNAFYMQRAIDSNNLKDALKYSAQMLSELRTSKLSPHKYYDLYMRAFDELRKLEIFFMEETRRGCSVIELYELVQHAGNILPRLYLLCTAGSVYIKTKEAPAKEILKDLVEMCRGIQHPLRGLFLRSYLAQISRDKLPDIGSEYEGDADTVIDAVEFVLLNFTEMNKLWVRMQHQGPAREKERREKERGELRDLVGKNLHVLSQLEGVDLDMYRDTVLPRVLEQIVNCRDEIAQYYLIDCIIQVFPDEYHLQTLDVLLGACPQLQASVDIMTVLSRLMERLSNYAALNAEVLPYFLQVEAFSKLNNAIGKVIEAQEDMPILSAVTLYSSLLKFTLHVHPDRLDYADQVLGSCVKQLSGKGKIDDTRATKELVSLLSAP…
AtVPS35B	AT1G75850	MRTLAGVEDEDKWLAEGIAGIQHNAFFMHRALDANNLREVLKYSALMLSELRTSKLSPQKYYDLYMRAFDQLRQLEIFFKDESRHGLPVVDLYELVQHAGNILPRMYLLCTVGSVYIKSKQAPSKDVLKDLVEMCRGVQHPIRGLFLRSYLAQVSRDKLPEIGSDYEGDANTVMDAVEFVLQNFTEMNKLWVRIQHQGPGTVREKQEKERNELRDLVGKNLHVLGQIEGVDLEMYKETVLPRVLEQVVNCKDKLAQYYLMECIIQVFPDEYHLQTLETLLAACTQLMPTVDTKIVLTQLMDRLSNYAASSPDVLHEFLQVEAFAKLSNAIGKVIDTQLEMPIVGAMTLFVSLLTFTLRVHPDRLDYVDQVLGACVVKLSSVPKLEDARAMKQVVALLSA…
AtVPS35C	AT3G51310	MIADDDEKWLAAAIAAVKQNAFYMQRAIDSNNLKDALKFSAQMLSELRTSKLSPHKYYELYMRVFNELGTLEIFFKEETGRGCSIAELYELVQHAGNILPRLYLLCTIGSVYIKSKDVTATDILKDLVEMCRAVQHPLRGLFLRSYLAQVTRDKLPSIGSDLEGDGDAHMNALEFVLQNFTEMNKLWVRMQHQGPSREKEKREKERNELRDLVGKNLHVLSQLEGVDLGIYRDTVLPRILEQVVNCKDELAQCYLMDCIIQVFPDDFHLQTLDVLLGACPQLQPSVDIKTVLSGLMERLSNYAASSVEALPNFLQVEAFSKLNYAIGKVVEAQADLPAAASVTLYLFLLKFTLHVYSDRLDYVDQVLGSCVTQLSATGKLCDDKAAKQIVAFLSAPLEK…
Citrus sinensis2
CisATG1a	Cs1g05170	MEQNKLSKNKTVGDYALKSKIGESSNSLSTVWKAEHLSSGDVVAVKQVYVEKLNKHLKSCLDCELNFLSSVNHPNIIRLFDAFQAENCIFLVVEFCAGGNLSSYIRLHGRVPEQTARKFLQQLGSSLPAFGAGLEILNSHHIIHRDLKPENILLSGLDDDVMLKIADFGLSCSTLYPGNYAEKVCGSPLYMAPEVLQFQRYDEKVDMWSVGAILFELLNGYPPFSGRNNVQLVRNINSCKHLPFSQLIVPALHPDCVDMCLKLLSANTVDRLSFNEFYHHRFLRRNSAILRAPFHIP
CisATG1b	orange1.1t03071	MSQATGRGRVVGDYLVGRQIGSGSFSVVWHARHRVHGTEVAMKEIAMGRLNKKLQESLMSEIFILKRINHPHIIRLHDIIEVPGKLHLILEYCKGGDLSMYIQRHGCVPEETAKHFMKQLAAGLQVLRDNNLIHRDLKPQNLLLSTDDDNAALKIADFGFARSLQPRGLAETLCGSPLYMAPEIMQLQKYDAKADLWSVGAILFQLVTGKTPFTGSNQIQLLQNIVKATELHFPPDAKILSADCKDLCQKLLRRNPVERLTFEEFFNHPFLSQTQPDQVFRSRMFSRSADDFPFYESKSVRDVVESSQDDCLPFFLDDDSSGPEGSPSFSKRRSSMKSTYGFSVDAKHGREATSSALNNLDLRYGNKLDNTNLRHDSYKLSDENLNEPPKCLDQRLANT…
CisATG1d	orange1.1t00581	MEPNRTRLIGEYIVGPRIGSGSFAVVWRARHRQLGIEVAVKEIDKKLLSPKVSDNLLKEISILSTISHPNIIRFFEAIETREKIYLVLEYCDGGDLAAYIHKHGKVSEAVARHFMRQLAAGLQVLQEKHLIHRDLKPQNLLVSTNEVTPVLKIGDFGFARSLTPQDLADTLCGSPLYMAPEIIQNHKYDAKADLWSVGAILFQLVTGKPPFDGSNQLQLFQNILTSTELRFPPGAIEELHPDCVDLCRCLLRQNPVERITFKEFFNHRFLGELRQTVHAEQHSVVPETKPMVELLNSSTPEDRHSLHSEHPTNSSSKNPKSACSSACDKVILNTGDQGNSLSTRDLHEFIPNMACDRMKKSVGSQYSSDQLKDLMESIEKEYVLINSHFASTDGFSFYL…
CisATG11	sjg022790.1	MSSSITEVLVHDGKLLVHISENGHSFELDCNENTPVEAVMRFIESAAGINFNDQLVLCLDMKLEPQKLLSAYRLPSDDKEVFIFNKLRLQSNSPPPSPEQVDVLEVADPPPPALSQDPHPLDDAPDPALKALPSYERQFRYHYHRGHAIYIRTQAKIEMCERLLREQKVQERAVEVGRGNLEQYYRVINQNYNDFMKRYSQQQRVHSDLLANFGRDIEKLRSVKLHPSLQTATCKCLLDFVKEEHLRKSAESCSSSHRQFENKVSQFKQIFDDVKRRVEELLNTRASLPIKNLEMMIKEHQRSINEQKSIMQSLSKDVSTVKKLVDDCLSCQLSSSLRPHDAVSALGPMYDVHDKSHLPRMQACDRSISKLLDFCQDKKNEMNVFVHNYMQKITYVSYV…
CisATG13	Cs1g05100	MASSHNMHSEAAKMEQIITEFYTKSLHIILESRSPYMSSRNFSGEQALSSPSSSTSSSSSVRPRDRWFNLALRECPAALENLDFWHQSNLEPMVVDVILVQRPLDWDPVNLSPKSELVRNLSSKERYPFCWSSDQEECGSEAKSEKIVERWVVQYDSRKVRDASSGSRRSSSNTLHNVYKKSILLLRSLYSTVRLLPAYKIFRDLNSSGQILTFSLAHRVSSFVEPFTRKEEAEFQRFGFTPVDTSSGRLCISVLYRSSISEVSSEPSTPMSPQFIPDYVGSPLADPLKKFPFLPVSHGSPSSLPFSRRHSWSFDHYKPSPPSVSFSPSPTHSEPHLSISNMNSRRFHPMSLPPHPPETSLVHKKNTSFDEYCPSPNFTPSPSPSPPIYIPGSHPSKSR…
CisATG20	Cs6g14260	MINTEQQRSASGSSQSPRSPSSQPYLSVSVTDPVKLGNGVQAYISYRVITKTNFPEYQGPEKIVIRRYSDFVWLRDRLFEKYKGIFIPPLPEKSAVEKFRFSAEFIEMRRQGLDLFVNRIASHPELQQSEDLKTFLQADEETMERLRSQDTGYFKKKPADLMQIFKDVQSKVSDVVLGKEKPVEESNPEYEKLKHYIFELENHLAEAQKHAYRLVKRHRELGESLSDFGKAAKLLGACEGDALGKAFSELGMKSEALSVKLQREAHQLLMNFEEPLKDYVRAVQSIKATIAERANAFRQQCELAETMKLKEINLDKLMLTRSDKVGEAEIEYKELKAESEDSTRRFETIVRLMNEEIVRFQEQKTLDMGIAFHNFSKGQARLASSIADAWRTLLPKLEA…
CisVPS15	Cs4g15580	MGNKIAKTTQASATEYYLHDLPSSYNLVLKEVLGGSRFFKSILCKHDEGLVLVKVYFKRGDYIDLREYERRLFHIRETFRSIDHPHVWAFQFWQETDKAAYLLRQYFFNSLRDRLSTPPFLSLVEKKWLAFQLLLAVKQCHEKGICHGDIKCENVLVTSWNWLYLSDFASFKPTYIPYDDPSDFSFFFDTGGKRLCYLAPERFYEHGGEMQVAQDAPLKPSMDIFAVGCVIAELFLEVPFFELSHLLAYRRGQYDPSQHLEKIPDSGIRKMILHMIQLEPELRFSAESYLQNYAAVVFPTYFSPFLHNFYCCWNPLHSDMRVAMCRSVFPEILKQMMGNKSSEDIGSGVGTPSTAMSVKESQERVTKQNLNLAKALLEKREEMEKGRVQNRFRLLGDIS…
CisVPS34	Cs7g08800	MSGNEFRFFLSCDINLPVKFRVDRLEGTLPSIKSPNSVNDRSGINSTTEERRPELYVECALYIDGAPFGLPMRTRLESMGPMYCWNEPITLSTKYRDLTAHSQLALTVWDVSCGKDERLVGGTTILLFNSKMQLKTGKQKLRLWPGKEADGSLPTSTPGKVPKNERGELERLEKLINKYEREQIQRVDWLDRLTFKALEKIKEQENFRNGNSYLYLVVDFGRLEHRVVFQDSGANFLLPAPITSTNELVIVWDPEVGKINPSEHKQLKLARSLTRGIIDRDLKPSNAERKSIQRILKYPPTRTLSGDEKQLLWKFRFSLMSEKRALTKFLRSVEWSDVQEAKQALELMGRWEMIDVCDALELLSPVFESEEVRAYAVCILERADDDELQCYLLQLVQAL…
CisATG6	orange1.1t00487	MKKEDAPDKGRTLSVDPNVPRWVCQNCRHFLCIVGVDSYADKYLNDSSRSTMHGSSIHASNSVLGSTRMDNSFVVLPKQRPQSHGVPPRPRGSSAQSEASQSGKAMDESFVVIYKSESASDGGGPHIPPPEGGTNGPMQPNNSGFHSTITVLKRAFEIATSQTQVEQPLCLECMRVLSDKLDKEVDDVTRDIEAYEACLQRLEGEARDVLSEADFLKEKLKIEEEERKLEAAIEETEKQNAEVNAELKELELKSKRFKELEERYWQEFNNFQFQLIAHQEERDAISSKIEVSQAHLELLKRTNVLNDAFPIWHDGEFGTINNFRLGRLPKIPVEWDEINAAWGQACLLLHTMCQYFRPKFPYRIKIIPMGSYPRIMDSNNNTYELFGPVNLFWSTRYDK…
CisATG2	Cs8g05820	MFSGWRIAKSAEELVPRGAVKRVCKFFLKKKLGQFILGDIDLDQLDVQLSDGSIQLHDLALNVDYLNQKLGAATSVMIKEGSIGSLLVKMPWKGKGCQVELDELELVLAPCWDNKSRDVDESCSTSQDDNNGMQWDTGQFGHDGAGNPSKFTPNDVHEGVKIIAKMVKWFLTSFHVKIKKLIVAYDPCIEKNENKVESHATLVLRISEIGCGTCVSEDSSSDSDARVESFLGINRLTNFVKFEGAILELVDVDAVNHQPGSLHTSGTPSGEVPSGCIPSDATTPIISWKRGGFSGNIKLSIPWKDGSLDIRKVDADVCIDPIELKFQPRTIKWFLLSWETYLKIDNDRMSHTLYKPTDSVYLNVSSQFRSSANVPAVIPADEMIPIRGSYSSSFPSFNS…
CisATG9	Cs5g29970	MMFSGQRGANPLSVFRWKWRGDSSLTTGLLNDVPPEIELSDYAHGRVPSPGSESPAGLLNGESLNVAPIADLDLFFERLYSYYCEKGLRCIIIKWIVELLSLGFTICFSAFFLLFVDWDGLRNAKCGMDAVESGIKPCDLAKEALHEHPLTPLTLSKAVIVGYLGLFSIYWIFCFLRFFAQLKDTLGIRHFYYNSLHVTDSEIQTMPWATILEKVVQLQSSQQLCVVKDLSAHDVVMRLMRKENYLIGMLNKGVLAFPIYSWVPGAGPTVRFGSDGVQHRLILTKTLEWTLNWCILQSMFDRNFCVRRDFVSNPKTLRKRLMVVGLAILLLSPFLVIFMVVYLFLRHAEQFYNHPSTASSRRWSNLSKWMFREFNEVDHLFKHRINSSVVHSSDYLKQF…
CisATG18a	Cs5g32770	MAALSAYSSPWPEPTPDPNPNPNPNSNTSCGVSSEDQTDQLQSLESFSSMPQDEPDSFSPSIPESNPNYQMPLPSPAESTSSSPPPTLLHISFNQDHGCFAAGTDHGFRIYNCDPFREIFRRDFERGGGIGVVEMLFRCNILALVGGGPDPQYPLNKVMIWDDHQSRCIGELSFRSEVRSVKLRRDRIIVVLEQKIFVYNFADLKLLHQIETIANPKGLCAVSQGVGSLVLVCPGLQKGQVRVEHYASKRTKFIMAHDSRIACFALTQDGQLLATSSTKGTLVRIFNTLDGTLLQEVRRGADRAEIYSLAFSSNAQWLAVSSDKGTVHVFNLKVNSGSARSEPRSTSDPTLPTSSLSFIKGVLPKYFSSEWSVAQFRLVEGSPYIVAFGHQKNTVVILG…
CisATG18b	Cs4g02320	MSNQSSSYPVFFVSFNQDNSGFALSTKDGFKIFDSSTGRLCYERAVGAFGIVEMLHSSSLLAIVGAGEQPSLSPRRLCLFNTTTGTALRELNFLTSILAVRLNKKRLVIVLREKTYIYDANTLAILDTIDTVPNLKGLCAFSPSLNACFLAVPASTTKGSVLVYNVMELHSHCEIDAHRAPLAAIVLSSNGMYIATASEQGTIIRVFLVSEATKSYSFRRGTYPSTIFSLSFGQSMQFQDILVATSSSGSLHVFSPGFAINQRRGGRTSSILGSILPESVNEVLDPADHHVLRNAFPAGVKSSAVVRKVDNISASSSSEFLAYRASISVITYNGYFVEYIFSINNCCESTWTLDREFNLLTKRA
CisATG18c	Cs7g29360	MTSTVSTSREILPPGPFGSPNAGASASALASFGHPQTGFSDVDEIELISVSWNQDYGCFAAGTSCGFRIYNCEPFKETFRRDLKSGGFRIVEMLFRCNILALVGAGDNSQYPPTKVIIWDDHQSRCIGEFAFRSDVRSVKLSRERIVVVLEHKIYVYSFVDLKLLHQIETLANLRGLCCLSHNSSTSVLACPGLQRGQVRIEHFGLNMIKLINAHDSHIACFTLTLDGLLLATASTRGTLIRIFNTVDGTRLQEVRRGVDRAEIYSIALSPNVQWLAVASDKGTVHIFSLRVRVVGEDSSSSLSTPSQSTELLNHSSSFDTLISPSTGANPGSSLSFMRGVLPKYFSSEWSFAQFHVPEVTHFIAAFGSQNTVVIVSMDGSFYRCSFDPVHGGEMLQQE…
CisATG18e	Cs3g14170	MMNQPDPITIHHLALNQDHGCFATGTETGFRVYLSDPYKPIMRRDFDRNPRGGTQLVSMLFRSNIICLVNSGPHQSNKVMIWDDHENRYLGELSFRSEVKNVRLRRDRIVVVLNQKVYVYNFTDLKLVDQIETVVNPTGLCDVSQNAGPMVMACPGLLKGQVRVEDYGTKKSKYITAHASRIASIAMTLDGRFVATASSKGTLIRVFNTMDGSLLQEMRRGAERAEIYSLAFSSNAQWLAASSDKGTVHVFGLKVDSGSPGTGKLHSAPEPNLSSKNSSAISSFRFIRGVLPKYFSSKWSMAQFRLPENVQYLVGFGRQNNTIVIVGLDGSYYKCEFDPMKGGEMHQLEHYKFLKPEEPF
CisATG18f	Cs4g11290	MQMLPRPITSKRSRDKFAEVRPLLVFCADGSRSCGTKVQDGLATACNGTSANYHDLGNGSSVPTVVHFYSLRSQSYVHMLKFRSPIYSVRCSSRVVAICQAAQVHCFDAATLEIEYAILTNPIVMGHPSAGGIGIGYGPLAVGPRWLAYSGSPVVVSNDGRVNPQHLMQSRSFSGFASNGSRVAHYAKESSKHLAAGIVNLGDLGYKKLSQYCSEFLPDSQNSLQSAIPGGKSNGTVNGHFPDAENVGMVIVRDIVSKNVIAQFRAHKSPISALCFDPSGILLVTASVQGHNINIFKIIPGILGTSSACDAGSSYVHLYRLQRGLTNAVIQDISFSDDSNWIMISSSRGTSHLFAINPLGGSVNFQPTDANFTTKHGAMAKSGVRWPPNLGLQMPNQQS…
CisATG18g	Cs5g32120	MKKGKGRNNGLLPNSLKIISSCLKTVSTNASTVASTVRSAGASVAASISNASEDLKDQVTWAGFDRLEYGPSVFKQVLLLGYQNGFQVLDVEDASNFNELVSKRDGPVSFLQMQPFPVKDDGCEGFRKLHPFLLVVAGEDTNTLAPGQNRSHLGGVRDGMMDSQSGNCVNSPTAVRFYSFQSHCYEHVLRFRSSVCMVRCSPRIVAVGLATQIYCFDALTLENKFSVLTYPVPQLAGQGAVGINVGYGPMAVGPRWLAYASNTLLLSNSGRLSPQNLTPSGVSPSTSPGGSSLVARYAMEHSKQFAAGLSKTLSKYCQELLPDGSSSPVSPNSVWKVGRHAGADMDNAGIVVVKDFVTRAIISQFKAHTSPISALCFDPSGTLLVTASVYGNNINIFRI…
CisATG18h	Cs5g34870	MKSNHNNNKQSNNNNIKHTNGLNLIPNSLKFISSCIKTASSGVRSAGASVAASISGDSHELKDQVLWSSFDKLELSPSSFKHVLLLGYSNGFQVLDVEDATNVSELVSRRDDPVTFLQMQPLPAKSDGQEGFRNSHPLLLVVACDEAKNSGLVHVHVGRDGLVRDGYDEPQPGNVAMSPTAVRFYSLRSHNYVHVLRFRSTVYMVRCSPRIVAVGLAAQIYCFDALTLESKFSVLTYPVPHFGGQGMSGVNIGYGPMAVGPRWLAYASNNPLLPNTGRLSPQSLTPPSVSPSTSPSNGNLMARYAVESSKQLAAGLINLGDMGYKTLSRYYQDFIPDGSSSPVSSNSSWKVGRNASHSSDTDIAGMVVVKDIVSRSVISQFRAHTSPISALCFDRSGTL…
CisATG3	Cs9g15060	MELQHKFYGIFKGTVEKITSHRTVSAFKEKGVLSVSEFVLAGDNLVSKCPTWSWESGEPSKRKSYLPADKQFLITRNVPCLRRAASVEEEYEGAGGEILVDNEDNDGWLATHGKPKAKCDEDEDDNLPSMEAVEISKNNNVRAISTYFGGEEEEEEDIPDMAEYNEPDSIIENETDPATLPSTYLVAHEPDDDNILRTRTYDISITYDKYYQTPRVWLTGYDESRMLLKTELILEDVSQDHARKTVTIEDHPHLTGKHASIHPCRHGAVMKKIIDVLVSRGVEPEVDKYLFLFLKFVASVIPTIEYDYTMDFDLGSSSN
CisATG4	Cs5g20640	MKGFREKAGASKCFSKSTPDTPNRSLASVGSELGSSETVKRLVTAGSMRRIHERVLGPSRTGISSSTSDIWLLGVCHKIAQDEALGDAAGNNGLAEFNQDFSSRILISYRKGFDPIGDSKITSDVGWGCMLRSSQMLVAQALLFHRLGRPWRKPLQKPFDREYVEILHLFGDSETSPFSIHNLLQAGKAYGLAAGSWVGPYAMCRSWEALARCQRAETGLGCQSLPMAIYVVSGDEDGERGGAPVVCIDDASRHCSVFSKGQADWTPILLLVPLVLGLEKVNPRYIPTLRLTFTFPQSLGIVGGKPGASTYIVGVQEESAIYLDPHDVQPVINIGKDDLEADTSTYHSDVIRHIHLDSIDPSLAIGFYCRDKDDFDDFCARASKLAEESNGAPLFTVTQ…
CisATG8a	Cs2g03030	MAKSSFKLEHPLERRLAESARIREKYPDRIPVIVEKAEKTDVPDIDKKKYLVPADLSVGQFVYVVRKRIKLSAEKAIFVFVKNTLPPTGALMSAIYEENKDEDGFLYMTYSGENTFGWSF
CisATG8c	Cs4g10210	MAKSSFKLEHPLERRQAESARIREKYPDRIPVIVEKAERSDIPDIDKKKYLVPADLTVGQFVYVVRKRIKLSAEKAIFIFVKNILPPTAAMMSAIYEENKDEDGFLYMTYSGENTFGASF
CisATG8d	Cs2g21350	MAKNSFKLEHPLERRQAEAARIRDKYPDRIPVIVERAEKSDVPEIDKKKYLVPADLTVGQFVYVVRKRIKLSPEKAIFIFVKNILPPTAAMMSAIYEENRDEDGFLYMTYSGENTFGIF
CisATG8g	orange1.1t00201	MSKSNFKIEHEFEKRRAEAERIREKYPDRIPVIVEKAERSDIPTIDKKKYLVPADLTVGQFVYVIRKRIKLSAEKAIFIFVDNVLPPTGAIMSTIYDEKKDEDGFLYVTYSGENTFG
CisATG8f	Cs5g08990	MAKSYFKQEHDLEKRRAEAARIREKYPDRIPVIVEKAERSDIPNIDKKKYLVPADLTVGQFVYVIRKRIKLSAEKAIFIFVDNVLPPTGAIMSAIYEEKKDEDGFLYVTYSGENTFGSHIPV
CisATG8i	orange1.1t01753	MGKMQSFKDEFTFEQRLEESREIIAKYPDRVPVIAERYSKADLPDMEKKKFLVPRDMSVGQFIHILSSRLHLTPGKALFVFVKDTLPQTATLMDSVYESFKDEDGFLYMCYSSEKTFGYERIQTC
CisATG10	Cs2g18190	MDILAWDGTLSLSEFSLAAHTLADKWKRFNPSFPSWSWVACRKQPWFGSREAEGYLSLENICLLSLRKEDRGEETCQGEEGTSCFKEEEPTDSATLVQNYDCDKHYYDFHVIYNASYRVPVLYFRAYCSGGQPLVLDEIEKGLPSCSAKALSESKWTFITHEEHPYLNRPWYKLHPCGTGEWMKLLFLGDTTQKKNGVAIELYLVAWFSVVGQVVGLSIPSEMLNDSNPL
CisATG12	Cs1g17600	MAATDSPSSTRKGESFITDDCIVVHFRATGGAPILKQAKFKISGSDKFAKVIEFLCRHLGRETLFVYVNSAFSPNPDELVIDLYNNFGFDGKLIVNYACSMAWG
CisATG5	Cs9g11540	MLNTTAVSSNRIHPPSSSNQFIIIANTSSIIRHHRRRDRISLLRNRNRNMHMEARKYVWEGAIPLQIHLHESEVTTLPPPPPALILAPRIGYLPLLVGLIKPYFGSSLPPGVDTIWFEYKGLPLKWYTPTGVLFDLLCAEPERPWNLTVHFRGYPVHVLIPCEGEDSVKWSFINSLKEAAYIINGNCKNVMNMSQSDQVELWRSVMNVAGNLEAYLRVSSKLKLITVEDDYTVKLNSSSKSQQGTGETDFAGQVKTGRIPVRLYVWSVSEDFDDLEDAPDIDCWDKISFINRPVEVHTEEAGKCFTLRDAIKTLLPEYFTDKPLFSDESPKLEDEEMNLSSEDAGSNKNTEVEEILYEHVTRNAEIKLVRIQGIEPKLEIPFSWVVNNLMNPDYFLYMC…
CisATG7	Cs2g04910	MAAKRESGSGGGSILQFAPFQSSVDEGFWHRLSSLKLNKLGIDESPIPITGFYAPCSHLQVSNHLSLLTESLPSDSDEQSSTAEISRGSRNKCTVPGTLYNSNTLESFYTIDKQSLLKQEAKKIWEDIHSGKAVEDSTVLSRFLVISFADLKKWSFHYWFAFPALVLDPPATVVDLKPASLWFSSQEAESVSAACSDWRNSSLTADVPYFLLTIAPNSRATIRHLKDWEACEGDGQKLLFGFYDPCHLQNHPGWPLRNFLALILTRWKLKSVLFLCYRENRGFTDLGLSLVGEALITVPQGWGDHQCVPNAVGWELNKGRKVPRCISLAKSMDPTRLAISAADLNLKLMRWRQLPSLNLDILSSRKCLLLGAGTLGCQVARMLMAWGVRKITLLDNGRV…
CisATG16	Cs5g06560	MSQEEIAREAIKHALKALRKRHLVEEGAHAPAIIALSRPIISQGSEWKEKADNLETELQQCYKAQSRLSEQLVVEVAESRSSKALLQEKESLITSLQEELTQIRDECSQLKTELEEKIKALELVVSENQQIRAQLEEMTMKAKNAEAENKMLVDRWMLQKMQDAERLNEANALYEDMIDRLKASGLEKLAKQQVDGVVRRSEEGAEFFAESTVPSTCKHKINAHEGGCASILFEYNSARLISGGQDKSIKLWDTNTGSLSSTLYGCLGSVLDLAITHDNRSVIAASSSNNLYVWDVNSGRVRHTLTGHTDKVCAVDVSKISSRHVVSAAYDRTLKVWDLHKGYCVNTIIFHSNCNALAFSMDGQTIFSGHIDGNLRLWDIQTGKLLSEVAAHSLAAVTS…
CisATG101	sjg319730.1	MNCEVCQLKELEVEHYEIREVLRCILHTIIFHRALGLVRPKDIDLELFEITYVQCGDLEVEKKIDEKIEQFISWVEKHPNKKSQICLSFYEVKNKQPSWFTNKIERLYWEQWYVNLNVAQLPKAHSNKSHHSKVVFDPGESASEERSVRRAALEASLRDVLFQIIKFVNEKKDHVPSISEGVIYFPYEITIPSSSDSAFGMDMIKRMLQTGHPTMLS
CisVTI12a	orange1.1t04711	MSQVFEGYERQYCELSAGLSRKCTAASALDGELKKQKLSEIKTGLDDADALIRKMDLEARSLQPNVKAMLLSKLREYKTDLNNLKNEVKRVTSGNVNQAARDELLESGMADAMMVSADQRGRLLMSTERLNHSTDRIKESRRTMLETEELGVSILQDLHQQRQSLLHAHNTLHGVDDNISKSKKILTAMSRRMSRDKWIMGSIISVLVFAILLILYFKLTR
CisVTI12b	Cs7g03410	MSEVFEGYERQYCELSTNLSRKCSSASLLPDGDQKKEKYSEIQSGLDDADALIRKMDLEARSLQPNVKAMLLAKLREYKSDLNKLKREFKRISSSDAHEELLESGKADPNVVSGEQRERLAMSVERINQSGERIRESRRVMLETEELGISIVEDLNQQRETLLNSRNKFLLV
CisVTI12c	Cs6g21610	MSDVFERYERQYCEISANLSKKCTAAASLDGERKKQKVSEIQTGLDEAESLIRKMDLEARSLQPNVKAVLLAKLREYKSDLNNLKSEVKRLVSGNLNAAARDELLESGMADALTASADQRSRLMMSTERVNQSTDRIKDSRRTMLETEELGVSILQDLSSQRQSLLHAHNTLHGVDDNVGKSKKVLTAMSRRMSRNKWIIGTVVAVLVIAIILILYFKLAK
CisVTI12d	orange1.1t00788	MSEVFEGYERQYCELSTNLSRKCSSASLLPDGDQKKEKYSEIQSGLDDADALIRKMDLEARSLQPNVKAMLLAKLREYKSDLNKLKREFKRISSSDAHEELLESGKADPNVVSGEQRERLAMSVERINQSGERIRESRRVMLETEELGISIVEDLNQQRETLLNSRNKVFLLA
CisNBR1	sjg269830.1	MNSSKLNKVSTSEETVPYSRVIVVFGLRVPDCSVAMESTMVIKVKYGDTLRRFNARVDENEKLDLDIDGLRAKIKSLFNFPHDSDLTLTYVDEDGDIVTLVDDDDLCDVMRQRLKFLRIDVHLNNDKFGKAYARSSGSSTPLRSPRIQHPLPDIDSKISDILKSVPEPLREAISKLSTDVASKAASTSPMIVDLVGYFSKMGLSHVNVVPQSQYGAESSGKAEASENLMAHSVSNDPNVSKDDGLREVLPKTNLKEVFPKTSLKEVLPKTTAVDSTSKSSKDADIGIAARGVGALLSSVDLNLPPVDSAPSGSTMSIAPPASNITAGDDRMDANENNVHQTTSVPMSTSSVDPMWPSDVNQPRTADLGGNLSTNCPFSGIPVANESAGSSRHPRRGHFK…
Vitis vinifera3
VvATG1b	VIT_08s0007g01150	MAQTPSRGRVVGDYLVGRQIGSGSFSVVWHARHRVHGTEVAIKEIVTGRLNKKLQESLMSEIFILKKINHPNIIRLHDIIEVPGKIHLVLEYCRGGDLSMYIQSYVRVPEATAKHFMQQLAAGLQVLRDNNLIHRDLKPQNLLLSTNDNNSVLKIADFGFARSLQPRGLAETLCGSPLYMAPEIMQLQKYDAKADLWSVGAILFQLVTGRTPFTGNNQIQLLQNIVKSSELHFPPDNNDLSADCKDLCQKLLRRNPVERLTFEEFFNHPFLSRKQPDEALSSRRSSRIIDGFPLSECNPVRNTEESSQEDCMPFPLDDDSSGPEGSPSFLRRRSSMKSTYGFSLDKKVDRRETIFNTPNNMDLASKYSSASHKPEITGFRIDSLRPSDENVKEPLKSME…
VvATG1d	VIT_15s0048g02400	MGDPDCKQCRVVGEYILGPRIGSGSYAVVWESRHRQSGMVVAIKEIDKEHLNPKVKDNLFKEIEILRTINHPNIIRLLQAIETSDRIFLVLEYCDGGDLAAYIHRRGRVPEAVARHFMRQLAAGLQVLHEKRLIHRDLKPQNLLLSTNEATTAPLLKIGDFGFARDLTQGLADTQCGSPLYMAPEIIQNQKYDAKADLWSVGAILFQLVTGRPPFDGSTQFQLFHNILSASELRFPQGALQELHPDCVDLCRRLLRQNPVERLTFNEFFNHKFLVEPRLTVDVEQPSLLPQTKPLVVQFECLRGKNLPTDSTQSPQLPFAHQLNSSTRNPSLTSSIHDVNSKILHRQEHGSTSSNKGGYRFMPSIAHDDPIADSMESIEKGYVLVNAHFASMETLSSSL…
VvATG2	VIT_03s0063g00600	MFPWNFAKSAEEMFSQWAIKRVCKFLLKKKLGQFILGDVDLDQLDVQLSAGTIQLSDVALNVDYLNQKLGAAAAVVVKEGSIGSLSVKMPWKVNGCQIDVDELELVLGPCVENNSTSGDETSVHNQVGNHDISQDFRKFENEMVDNAATSASLDVHEGVKTIAKMVKWLLTSFHVKVRKLIVAFDPCSEKNEKKTGFQKALVLRIDETECGTCVSEDDNSNGDARVESFLGISRLTNFIKFQGAIIELLQIDDVDHQTSFPCTSGSFSELLSGFCPSNATTPILTGEGGGFSGTVKLSMPWKNGSLDIHKVDADVYIDPIELRFQPSTINWFLLLWESLKSLGRDGLDGKECIHHKTTESVIPTCESFAADFCSTTGQESVTDILLPHLISDWVPFSVN…
VvATG4	VIT_00s0215g00030	MKGFCEKAVASKFSCKTKSDSSNSEPQSSDTKLSKVSLWSSVFASAFSVFETNSESSPSASEKKAIDNGRNNGWTTAVRKVVTGVSMRRIQERVLGTSKTGISSSTSDIWLLGLCYKISQEESSNHASSSNGLAEFEQDFSSRILMTYRKGFEAIGDSKLTSDVNWGCMLRSSQMLVAQALLLHRMGRSWRKTSHKPMDQDYIEILHHFGDSKASAFSIHNILQAGKAYGLAAGSWVGPYAMCRSWETLARSKREETDLECQSLPMAIYIVSGDEDGERGGAPVVYIEEASRHCLEFSKGQVDWTPILLLVPLVLGLEKVNPRYIPSLAATFTFPQSLGILGGKPGASTYIVGVQDEKAFYLDPHEAQSVVDIRRENLEADTSSYHCNIIRHICLDSID…
VvATG5	VIT_02s0012g02270	MDVEAMGREAQKYVWEGAIPLQIHLHESEVTTLPHPSPALVLAPRMGYLPLLLPLLKPHFSSTLPPGVDTIWFEYKGLALKWHIPTGVLFDLLCAEQERPWNLTVHFRGYPGNILTPCEGEDSVKWSFINSLKEAAYIVNGNCKNVMNMSQSDQMELWHSVLNGNMEAYQRVSSKLKLEKVGDQYVGKPNSNLLKSRTNTGETDTGGPVKTGRIPVRLYVWSVSKDFDDLEDAPQIDSWDQISYMNRPVEIHREEDKCFTLRDAVKALLPELFVEKTLIDEEISRIELEEESRAPSDDESNTRNEEDVEEKQRENVECCCPSDDAETKLKLVRIQGIEPKLEIPFSWVVNNLMNPEHFLHICVFVKVPQAKPLPHDR
VvATG6	VIT_15s0046g00950	MMEDSANKSRTFPVDPTLPRWVCQNCRHNLCIVGVDSYADKFYSDSSRSGMQGSLIHGAGSVLGSTHMDHSFVVLPKQRNQAQGVPPRPRGGAVQPDVSQSGKAMEESFVMLPPAPASVYKCESAAEGSGTHLPSPEGGPSGHLQPNNSGFHTTITVLKRAFDIATTQIQVEQPLCLECMRVLSDKLDKEVEDVNRDIQAYEACLQRLEGEARDVLSEADFLKEKLKIEEEERKLEAAIEETEKQCAQVNAEMKELELKSSRFKELEERYWHEFNNFQFQLTSHQEERDAILAKIEVSQAHLELLKRTNVLNDAFPIWHDGEFGTINNFRLGRLPKIPVEWDEINAAWGQACLLLHTMVQYFRPKFQYRIKIIPMGSYPRITDSNNSTYELFGPVNLFW…
VvATG7	VIT_10s0003g01150	MLSYSISIPEKPILRNRGGSFTFIVSPKLQICNTGGGGERERGIRSDPIRLGFLFSQTVPSFVTQRAIKLKSFLCMAGQESGAVLQFAPFQSSVDEGFWHRLSSLKLNKLGIDDSPISITGFYAPCSHSQVSNHLTLLAESLPPEPSEQSSTPPISRGNRNRCSVPGILYNTNTLESFHALDKQSLLKAEAEKIWNDIHSGRAEEDCSVLSRFLLISFADLKKWSFHYWFAFPALVLDPPATLVDLKPASQWFSLEEAESVSAACNEWRNSSSTADVPFFLVSIASNSRATIRHLKDWEACQEDGHKLLFGFYDPCHLPKNPGWPLRNFLVLIYSRWNIKKVQFLCYRENRGFADLGLSLVGEAQISAPQEWRDELHVPNVVGWELNRGKKVYRCISLA…
VvATG8a	VIT_10s0116g01700	MAKSSSNFKLEHPLEKRQTEAARIRKKHPDRIPVIVEKANRSDIPSIDKKKYLVPADLTVGQFVYVIRKRIKLSAEKAIFVFVKNTLPSTAALMSAIYEENKDEDGFLYMTYSGENTFGFCK
VvATG8c	VIT_19s0090g00580	MARSSFKLEHPLERRQAEAARIREKYPDRIPVIVEKAERSDIPDIDKKKYLVPADLTVGQFVYVIRKRIKLSAEKAIFIFVKNVLPPTAAMMSAIYEENKDEDGFLYMTYSGENTFGSF
VvATG8d	VIT_12s0059g00660	MAKISFKMEHPLERRQAEAARIREKYPDRIPVIVERAEKSDIPDIDKKKYLVPADLTVGQFVYVVRKRIKLTPEKAIFIFIKNILPPTAAMMSAIYEENKDEDGFLYMTYSGENTFGSLIM
VvATG8e	VIT_15s0048g00660	MAKSYFKQEHEFEKRRAEAARIRDKYPERIPVIVEKAERSDIPNIDKKKYLVPADLTVGQFVYVIRKRIKLSAEKAIFIFVDNVLPPTGAIMSAIYDEKKDADGFLYVTYSGENTFGYQISPQL
VvATG8f	VIT_02s0154g00390	MIFADEGGMAKSYFKQEHDFEKRRAEAARIREKYPDRIPVIVEKAERSDIPNIDKKKYLVPADLTVGQFVYVIRKRIKLSAEKAIFIFVDNVLPPTGAIMSGIYDEKKDADGFLYVTYSGENTFGYEIPH
VvATG8i	VIT_07s0005g02200	MSSFKNEFSYEERLEESRDIIAKYPDRVPVIAERYSKTDLPEMEKKKFLVPRDMSVGQFIHILSIRLHLTPGKALFVFVENTLPQTASLMDTVYESFKDEDGFLYMSYSSEKTFGYADIQIHGH
VvATG9	VIT_07s0005g03100	MFRGQKGANALSIFKWKWHGESSLTTGLLNDVPPEIELSDYRRIPSPGSDSPSGLLNGESRNVEPITDLDLFFERLYNYYCEKGLWCIIIKWIVELLSLGFTICFSAFFLLFVDWNGLHNAKCGMDAVESGIKPCDLSKEALHQHPLTPFTLSKAIIVGYLGLFSVYWIFCFLRFFAQLKETLGIRHFYYNSLHVTDNEIQTIPWASILEKVVQSQSSQQLCVVKDLSAHDVVMRLMRKENYLIGMLNKGVLAFPISRWVPGAGPTVKFGSNGVQHHLILTKTLEWTLNWCILQSMFDRNFCVRRDFVSNPKTLKKRLMVVGIVMLLLSPFLVIFILVFRFLRHAEQFYNHPTTASSRRWSNLSKWIFREFNEVDHLFKHRINSSVVHASDYLKQFPSP…
VvATG10	VIT_07s0151g00710	MDISSWDGTLSSSDFCLAAHAFTEKWKRINPVLPPWSWVPRPKSPWLTSHEVEGYLSLENMCILRSCEEDHDEKSHKGNEEPNCPGKDEYIDNATLVQSYSHDVRYFDFHIVHSASYRVPVLYFRTFSSDGQPLLLEDVEKELPGNSTNVLMESKWTFITQEEHPYLNRPWYKLHPCGTSEWMKLLFLTDPSLGGSQGVPVELYLSSWISMVGQAVGLKVPLEMFNKRTE
VvATG11	VIT_11s0037g00730	MSSNNEGDLVQGAKLFVRIAQNGHSYELDCNESTPVEVVQQLIASVAGINSNDQLLLSLEWKLEPPRQLSAYNLPSDNGEVFVYNKARLQANSPPPEPELVDILEIVEPLLPSSSHNPHLLDDASDPALKALPSYERQFRYHFHRGRAIYSCTVVKYENCQRLWREQGVQERALEIARANLEQFYRMVHQNFVDFMKFYSQQHRIHSDLLMNFGRDIDKLRSCKLHPALQTANRKCLLDFVKEENLRKWMENCSSSHRQFETKVSQFKQMYSDVKRKVDDLLSSKTSLHTTNLELMIKEHQRYINEQKSIMQSLSKDVSTVKKLVHDSVTCQLSSSLRPHDAVSALGPMYDVHDKNHLPKMQACDHSISKLLDFCIDKKNEMNNFVHNYMQRVTYVSYI…
VvATG12	VIT_09s0002g01390	MASESPSSARKVVVHLRATGDAPILKQAKFKIPGTDKFAKVIEFLRRQLHRDTLFVYVNSAFSPNPDELVIDLYNNFTGFIMAWIFQGYKTKRRGNALKFPKQLCNPGLAFNGKESATLVSQLGCPGNKAEQPILELV
VvATG13a	VIT_04s0044g00610	MASLGNMNSEPPEIEQIVTEFFAKSLHIILESRSPYASSRNYSGDPTISPSSSSSSSSSVRPRDKWFRLALRDCPAALENIDFWRQSNLEPMVVDVILVQRPHDWDPINCIPRRDLLRNTSLKEQSRNSWGSEQEEFGCVAKSEKIIERWVVQYESRKNSSLGSKRSSNSNSHNLLKIQHTLYKKSIILLRSLYLTVRLLPAYKLYHDLNSSQIHAFTLAHRVSSIIEPFTGREEVEMQRFCFTPVDTCCGRLCLSVLYRASLLDVSSEPSTPMSPQVIADYVGSPMADPLKRFPSLPTTCSPSSAPFSRRHSWSYDLYRASPPSVSFSPSPTHSESRASVSNPASRRLPPMSLPPHPPEMSAAHHKNTGFDEYWPSPTISPPSSASPPTNTLGSHLPK…
VvATG13b	VIT_16s0098g00590	MDLQSHPQPELGRLEQIVSQFLLKSLHIVLDSRIPSLRPARDRSGNVSGISRVRKSDKWFSLQLGDRPAALDNLHFWHRNLMDPMIIDIILVREGSNSSSSMDNVYSTAAVGTSVETVIERWVVQYESPRLMATPTGESSATYKKIYKKLIILLRSLYSTIRLLPGYRVFRLLSSLTQSYDFDIIYKVSSFTEPFSRAEEEVMKHYSFLPVEALSGRLCISVTYHQTLSDFNLEPLTAFPPTIITDYVGSPAADPLKAFPSSEKGIRATSFPLRGRGVRSPSSAPFQRPHSWTSGGHRAAPFTPNQPLSGSPPAFRMPYMPYDLPTQPLDIYGHGYQLSPPFSPSQSPSPPTYFSSSNPMYSRFSSETAPVTIPLPLVGRGSRYLSPNSSDPSRHSLPP…
VvATG18a	VIT_14s0060g02380	MATLSPPSSSASWPLPPSGPNPNPNFLSPPVAPNSPPSASSSQTIDLPESEYNDDSVPPSADPTRFPAPTLLHLSFNQDHGCFSAGTDHGFRIYNCDPFREIFRRDFCGDDGGSGTGIGVVEMLFRCNILALVGGGPDPQYPPNKVMIWDDHQTRCIGELSFRSEVKSVRLRRDRIVAILLQKIFVYNFADLKLLHQIETIANPKGLCEVSQLSGSMVLVCPGLLKGQVRVEHYNSKRTKFIMAHDSRIACFALTQDGRLLATSSSKGTLVRIFNTLDGTLLQEVRRGADRAEIYSVAFSSSAQWLAVSSDKGTVHVFSLKVESGSLGSDRSRSSSEPNLSVPSAVSSLSFMKGVLPRYFSSEWSVAQFRLHEGSQYIVAFGHQKNTVVILGMDGSFYR…
VvATG18b	VIT_11s0037g00970	MANHSSSYPILCASFNQDTSYFAIGTRDGFKVFDSETGTLRYERAIGGFIIVEMLFSSSLLAIVGAGEQPSLSPRRLCLFNTTTGAALRELNFLTSVLAIRLNRKRLVVVLQEKTYIYDLNSLSILDTIDTVPNSKGLCAFSPSLDGCFLALPASTTRGSVLVYNVMELHSHCEIDAHRSPLAAIVFSPNGMYIATASEQGTIIRVHLISEATKSYSFRRGAYPSTIFSLSFGPSTQFPDVLVATSSSGSVHAFSLGLGMNQR
VvATG18c	VIT_13s0067g00170	MSSSVSTSRGMLPSARLDAHGSNSGTPGSFGQSVPEFNDTDETGLLSVSWNQDHGCFAAGTTHGFRIYSCDPFKEIFRRDLKSGGFGIVEMLFRSNILALVGAGTNSQYPPSKVIIWDDYERRCIGEFSFRSDVRAVKLRRDRIVVVVEHKIYVYNFTDLKLLQQIETLANPRGLCCLSHHSNTFVLACPGLQRGLVRIEHFGLNMTKLIKAHDSHVACLTLTMDGLLLASASMKGTLIRIFNTMDGTRLQEVRRGSDNAEIYSIALSPNVQWLAVSSEKGTVHIFNLRVRVVGEDSSNHSITAQGPAPFYRNSSNSLDALISPNAGANPGSSLSFMKGFLPKYFSSEWSFAQFRVPEDTQFIATFGSQNTVIIVGMDGSFYRCSFDHLNGGEMLQQEY…
VvATG18d	VIT_07s0104g01790	MATLSAFSTPSPPWPNPNPSSDPNPNAKSDLPDHEERSQRTELEDVDSPPNSRPTQNFNPNIQDGRLSPSSVPSLLHISFNQDYGCFATGTDRGFRVYTCDPFREIFRRDLDRGGGIGVVEMRLVSNLMALVGGGSDPQYPLNKVMIWDDYESRCIGELSFRSEVRAVRLQLDRIVVVLEQKIFVYNFADLKLLHQMETIANPKGLCAVSQVAGSIVLVCPGLQKGQVRVEHYASKRTKFIAAHESRIASFALSMDGQLLATASSKGTLVRIYNTMDGVLLQELRRGADRAEIYSMAFSSTAQWLVVSSDKGTVHVFSLKVNLASPGNDKSRGASNSNLAVASSTSSLSFIKGVLPKYFSSEWSVAQFRLPEGSQYIVAFGHQKNTVVILGMDGSFYRC…
VvATG18e	VIT_07s0104g01780	MATLTAVSSASWPNPNPSPNSTFLSQQSHPEQYPAVQDPTAMRQHQGTGLSGDGGEDESFSSSPNHHTVQSPNSNLREVVSYSTSSIPSLLHISFNQDHGCFAAGTDNGFRIYNCDPFREIFRRDFDRGGGIGVVEMLFRCNILALVGGGPEPQYPLNKVMIWDDHQSRCIGELSFRSEVRAVKLRRDRIIVVLEQKIFLYNFADLKLLHQIETIANPRGLCAVSQLTASLVLVCPGLQKGQVRVEHYASRRTKFFAAHDSRLACFALTTDGQLLATASTKGTLVRIFNTSDGTRLQEVRRGADRAEVYSMAFSSTAQWLAVSSDKGTVHVFGLKVNSGSLGNDKSHGASDANLAVASSGLSLSFIKGVLPKYFSSEWSVAQFRLHEGSQYIVAFGHQK…
VvATG18f	VIT_19s0014g05190	MRNNDGPKPHSGRTNGFIPTSFRAISGYLRIVSSGASTVASTVRSAASSIVDRDDDASHDQVQWAGFDKLECDGNINRQVLLLGYRSGFQVWDVEEADNVRDLVSRHDGPVSFLQMLPNPVASKGSKDKFADSRPLLVVCSDGSLSGGGNIQDGFGTPYKEGIPNSHDTVNGSAMPTVVRFYSLKSQSFVHFLKFRSVVYSVRCSSRVVAISQAAQIHCFDVATLEREYTILTNPIVTGSLSSGSIGYGPLAVGPRWLAYSGSPVVVSNYGRVSPQHLTTSGSFSGSASNGSLVAHYAKESSKQLAAGIVSLGDIGYKKLSRYCSELLPDSNNLPHSGSPGPGWKGNGAVNAHFPDADNVGMVIVRDIIAKSVITQFKAHKSPISALCFDPSGTLLVTA…
VvATG18g	VIT_07s0104g00860	MKKGKARNNGLLPNSLRIISSCLKTVSTNASSVASTVRSAGVSVAASISAASEDHKDEVTWAGFDRLELSPSAFKRVLLLGYQNGFQVLDVDDASNVSELVSKRDGPVTFLQMQPIPLESDGHEGFRTSHPLLLVVAGDESNCLNPGQNHSHFGGLGRDGSSDSQSGNCISSPTAVRFYSLRSNCYVHVLRFRSAVCMVRCSPRIVAVGLATQIYCFDALTLGNKFSVLTYPVPQLGGQGTLGVNVGYGPMSVGPRWLAYASNNPLLSNRGRLNPQNLTPSPGVSPSTSPGSSSLVARYAMESSKQLAAGIINLGDMGYKTLSKYYQDLLPDGSNSPGWKVGGLAAAETDNAGMVVIKDFVSRAVISQFRAHTSPISALCFDPSGTLLVTASVHGNNIN…
VvATG20	VIT_08s0007g02960	MISTQRSGSGSSQSPRSPSAQPFLSVSVTDPVKLGNGVQAYISYRVITKTNLPEYQGQEKIVIRRYSDFVWLRDRLFEKYKGIFVPPLPEKSAVEKFRFSAEFIEMRRQALDIFVNRIASHHELQQSEDLRTFLQADEETMERARSQETGIFKKKPADLMQIFKDVQSRVSDVVLGKEKPVEESNPEYEKMKHYIFELENHLAEAQKHAYRLVKRHRELGQSLSDFGKAVKILGACEGNGLGKAFSELGTKSEMISIKLQKEAHHLLMNFEEPLKDYVRAVQSIKATIAERANAFRLQCELAETIKLKEINLDKLMLTRSDRVGEAEIEYKELKAESEEATKRFETIVRLMNEEIVRFQEQKTLDMGLAFHEFAKGQARLANGIADAWRSLIPKLESCS…
VvATG101	VIT_00s0253g00070	MNCEACDLKELELENFQIREVLRCILHTIVFHRALGLVRPKDIDLELFEITYVQCGDAEVERKINEKIDQFISWVEKHPNKKSQICLSFYEVKNKQASWFTNKIERRSWEYWYINLNVAQHPKAHSSKSHHSKAVVDPGESASEDRSLRRAALEASLREVLFQIIKFVNEKKDHIPSIPSAEGVSFPYEITIPSSSDSAFGMDMFKRMLQSGHPTMLS
VvATI	VIT_15s0046g02370	MFFVVLKFRIRSPRLVPVKGKSKIQNFSSWFFTFAMRPKKETNLLKMADNEEGEETTSRGNEWEVVSLTASAYAAAPGPKGIEMSDDGKSNTFKGNEAETSHAMFLSGHFVFPPSQHENLPLEPDDTEIHNEHGSEDVIPESNVEKGGHSDGKNEDNWSVKDLTKGDEFPGIQLFDEGGKSLSDRGKGFEEGTALKGLNLVDKEPDIYSAAKFSSLHSEPTIGGSTTYDGNTVIPDLVEPPELGADLHADISQSPKSTKDDDRYDGSNLPCEAWWKRRAASFYGHAKEANAFWSIFIAAAVMGLVILGQRWQHERWQVLQLKWQFGVNDEKMGRMLGPIIRLKDVIVGGNRRGSFIRGSSTSGNR
VvVTI12a	VIT_17s0000g06580	MSQVFEGYERQYCELSANLSRKCTAASLLNGEQKKQKVSEIKAGLDDADALIRKMDLEARSLQPSVKAMLLAKLREYKTDLNNVKNEVKRITSANTNQAARDNLLESGMADTMTVSADQKTRLLMSTGRLNQSGDRIKESRRTMLETEELGVSILQDLHQQRQSLLHAHNTLHGVDDNISKSKKILTAMSRRMSRNKWIIGSVIAALVLAIILILYFKLAH
VvVTI12b	VIT_14s0108g01200	MGEVFDGYERQYCELSANLSKKCTTASLLDGEQKRQQISEIKAGLDEADSLIRKMDLEARGLQPNVKAVLLAKLREYKSDLNNLKSEVKRIASANSNQAARDDLLESGMADAMSVSANQRARLMMSTDRLNQSSDRIKESKRTMLETEELGVSILQDLHQQRQSLLHANDTLHGVDDNVSRSKKILTNMSRRMSRNKCIIGSIIAVLVVVIALILYFKLSK
VvVTI12c	VIT_01s0113g00540	MSEVFEGYERQYCELSTNLSRKCTSASVLDGEEKHQKISEIEAGLEEAVILIRKMDLEARSLQAGVKAMLLAKLREYKADLNKLKKEVKKITSPDTNQVAREELLESGMVDAHMVSADQKGRLAMSTEKLNESSDRIKESRRTMLETEDLGVSILQDLHQQRQTLLHAHEKLHGVDNAIDKSKKILTAMSKRMSRNKWIVGSVISALVLAIIFILYFKLS
VvVPS15	VIT_11s0016g03000	MGNKIARTTQASASEYYLHDLPSSYNLVLKEVLGRGRFFKSIQCKHDEGLVLVKVYFKRGDSIDLREYERRLFQIQGIFRALDHPHVWPFQFWIETDKAAYLLRQYFFNNLHDRLSTRPFLSLIEKKWLAFQLLCAVKQSHENGVCHGDIKCENVLVTSWNWLYLADFASFKPTYIPDDDPSDFSFFFDTGGRRLCYLAPERFYEPGGEMQVAQGAPLRPSMDIFAVGCVVAELFLEGQPLFELSQLLAYRRGQYDPSQHLEKIPDSGIRKMILHMIQLDPESRFSAESYLQNYASILFPSYFSPFLHNFYSCLNPLDSDTRVAVCQSLFHEIHKQMMSNASAEVTSAELSTPLNATGCKPSKQVVAKQKLNLTKNSSRKQENEKGLIHNQFELLGDIN…
VvVPS34	VIT_01s0127g00430	MSGNEFRFFLSCDINLPVTFRIERLEGNLPSVKSSISEFDYTTEERRAELYVECALFIDGAPFGLPTRTRLESTGPSYCWNELITLSTKYRDLTAHSQLALTVWDVSCGKDEGLIGGATILLFSSKKQLKTGKQKLRLWPGKEADGSFPTTTPGKVPRHERGELERLEKLMNKYERGQIQRVDWLDRLTFKAMEKIKERESCKNGSSHLYLVVDFCSFEHRVVFQESGANFFLPSPPIASTNELVIVWDPEVGKMNPSEHKQLKLARSLARGIIDRDLKPSNNERKSIQRILKYPPTRILSGDEKQLLWKFRFSLMSEKRALTKFLRCVEWSDLQEAKQALELMGKWEMIDVCDALELLSPVFESEEVRAYAVSVLERADDEELQCYLLQLVQALRFER…
VvNBR1	VIT_17s0000g09280	MESTKVIKVKYGNTLRRFNACLDENGELDLDINGLRAKVITLFNLVPDADLTLTYIDEDGDVVTLVDDEDLHDVMRQRLKFLRITVLLNIEKDGRSHTRSSGSSTPMRSPFNLRPFQDGNAGVAPMRSPFDLRPFQDGNAGVAPMRPPFDLRPFQDGNAGVAEFIKSVPEPLLEAFSKLSTDFTSKAASSAPVLSEVLTCLSKMGESYLNSVSPSEVGADSSTHNRSSDNSVDPLVTENTKAPQADSKQELLPTAELKDSNSKLNEVGTTGPVSRGIASNVPATDNKEANVESNVAPVASNDPSVDKRKETKKESKYAPIACSDCANDPSVDKRKETKKESKYPPVACSDCASDGRKGTKKGSVDHYGEKLADCVASTWNAGYPRPYNPDPSHITCLDS…
Camellia sinensis4
CsATG1a	CSS0006404.1	MGRLNKKLQESLMSEIVILRQTNHPNIIRLHDIIEETGRIHLVLEYCRGGDLSIYIQQRQGRVPEATAKYFMQQLAAGLQILRDNNIIHRDLKPQWSINDWYDGV*
CsATG1b	CSS0044531.1	MESGSSDVMVTAGEYILWEKLGGRMSTVWKAEHRTHGQAVALKQVRLSNLTRTLKISLDCERNFLSSVHHPNIVRLLDVFQGFSDFIFPCLESELKNP*
CsATG1c	CSS0001934.1	MAQSTSRGGGGGRCVGEYMVGKQIGSGSFSVVWHARHRVHGTEVAIKEIVTEKLSKKLQESLMSEIDILKQIDHPNIIRLHDIIEEPGRIHLVLEYCRGGDLYMYIHQRRGRVPESTAKHFMQQLAAGLQILRENNFIHRDLKPQNLLLSTHDDNAVLKIADFGFARTLQPLGLAETLCGSPLYMAPEIMQLQKYDAKADLWSVGAILFQLATGKTPFTGSNQIQLLQNIVKSTELNFPPDKKDLSSDCIDLCRKLLRRNPDQKGNDVLLTLRLIRKRKQFTHSLTIHCHIYIYTQYSHISAQTQGVLVENTEKKLKPCSDVSLGKEVNKLQRRRHESKRDRARLQILTDKVTINLNVLERGRRRLRNAQVREKTAKANNFSSSMSHSTVFNFGSGTGN…
CsATG1d	CSS0039644.1	MLTKLLLQPPPPQPPLIAPLVGGGLRSSGALHGGSQDLNIWCLLVRLVPWRLLVETRVSILHPNDHAETVCGSPLYMAPEILQFQQYDAKILQNVQSCSCLPFSELILPGLHPDCVDMCSRLLSIKPGYEDLEVKAAHESSSLSTFTEIKFAWLFNQERGMGDAERLKIFTQYSM*
CsATG1e	CSS0042370.1	MAPEIMQLQKYDPKADLWSVGAILFQLVTGKTPFTGNNQIQLLQNIMKSTELQFPPNKKDLSSDCLDLCQKLLRRNPVERLTFEEFFNHPFLSLRQSDEFLRNSSPRTIDGFSLSESNPVRNAEESSQDDCLPFILDDDSSGPDGSPSFVRRPSMKSTYGFSLDTKVDRKEVFNTSNNMDRTSKNSIVTHTGFRIGSRRSSDGNLKESFKSTDQRPMNTHPRVVDSLELVYQDYVIVSGPPMDVSSSLVSASKPSHLPRKLENPQEESANFNTTPSAPMPIIGAVGSRLGRVGSLDSHSSTPSGTSHGSMDIGDALEQPSLHCMTRIKSLQWAASAITELVNKKKIEPGRQLEAFSIQLVILAIWKQALHICHTQAVSAIEGSPSREMARLRESTNQEH…
CsATG11	CSS0046771.1	MSSNVSEAIVQRGKLLVHIAENGHSFELECDEYTVVEAIQRFLESVSGIPLNDQLLLCLDMKLESQRPLSAYKLPSDDREVFLPFHHHPPPITPTHWMMLSDPALKALPSYERQFRYHYQRGHAIYSRTQVKFETCERLLREQQVQERALEIARGNLDHFYKMILQNYMDFMKCYSQQHRSHSNLLVNFGREIEKLRSCKLLSVLQTNSRKCLFDFVKEESLRKVVEDCSSSHRQFENKVLEFKQEFGELKRSAEQLFTNKTSFLIRELELKIKEHQRYIDEQKLKDVNTVKKLVDDCLTSRLSSSLRPHDAVSALGPMYDGHDKNYLPKMQSCERAISNLLDFFTEKKNDMNIVVHSYMQKIAYVQYTIKDVRYKFSVFTEAIKRQNDQFEYLKVVRG…
CsATG13	CSS0024224.1	MDLQGNVQAENGRFEQIVNQFLLKSLHIILDSRVPSIRPYGRSRDLLSGTPVKKLDRWFSLYLGDRPPALDNLSFWQKNLTEPMIIDVLLVQEVPDYSSEHNPTSLLGSGNCFETVIERWVVQYEYIRTAFPQVGDFSASYKKTYKKSIILLRSLYSMMRLLPAYRAFRKLCSPSQASDFGMNYKLSSFSAPFLRAEEEVMKQYSFPPVDAPQGRLSISVTYRESLSNFNLETSTSFPPQIITDYVGSPATDPFRSLPSSEKGFSATSFPSRGGRSPSSTPFQRPQSWTSGLHRMSPLMQPLSGGSPPLHRTSTMPHDYSSSPPDTYGHRIQNYRLPTHHKTTSFDEHQLSPPFSQSPSPSPPPYLSGGNPMQTRLRSETAPVSIPHPMMGRSPRYLSP…
CsATG20a	CSS0032993.2	MITQQRSLSQSPRSPSAQPFLSISVTDPAKMSNGVQPYISYKVITKTNLSECEGPEKIVIRRYSDFIWLRDHLFEKYKGIFIPPLPEKSTVEKFRFSAEFIEMRRQALDIFVNRIASHHELQQSEDLRTFLQADELTMERARSQETGIFKTKPADLMQIFKDVQSKVSDVVLGKEKPVEESNPKYEKLKHYIFELEDHLAEAQKHACRLVKRHRELGQSLSDFGKAVKLLGACEGNALGKVFSELGAKSEVLSIKLQKEAYHLLMNFEEPLKDYALAVQSIKATVAERANAFSQQYELAETIKLKEIDLNKFRLTRSEKLAEAQHEYEVMREDSEEATRRFETIVRLMNEEFVCFQEQKTLNMGVAFHEFAKGQARLATDIADAWRSLLPKLEACSA*
CsATG20b	CSS0047631.1	MITQQRSLSQSPRSPSAQPFLSVSVTDPAKMSNGVQAYISYKVITKTNLSECEGPEKIVIRRYSDFIWLRDHLFEKYKGIFIPPLPEKSTVEKFRFSAEFIEMRRQALDIFVNRIASHHELQQSEDLRTFLQADALTMERARSQETGIFKKKPADLMQIFKDVQSKVSDVLGKEKPVEESNPEYEKLKHYIFELEDHLAEAQKHACRLVKRHRELGQSLSDFGKAVKLLGACEGNALGKVFSELGAKSEVLSIKLQKEAYHLLMNFEEPLKDYVLAVQSIKATVAERANAFSQQYELAETIKLKEIDLNKFRLTRSEKLAEAEREYEVMREDSEEATRRFETIVRLMNEEFVCFQEQKTLDMGVAFHEFAKGQARLATGIADAWRSLLPKLEACSS*
CsATG20c	CSS0005836.1	MISQQRSLSGSSQSPRSPSSQPFLSVSVTDPAKMGNGVQAYISYKVITKTNLPEYQGSEKIVIRRYSDFEWLRDRLFEKYKGIFIPPLPEKSTVEKFRFSAEFIEMRRQALDVFVNRIASHHELQQSEDLRTFLQADEQTMERARSQETGIFKKKPADLMQIFKDVQSKVSDVVLGKEKPVEESNPEYEKLKHYIFELEDHLAEAQKHAYRLVKRHRELGQSLSDFGKAVKLLGTCEGDALGKVFSELGAKSEILSIKLQKEAHHLLMNFEEPLKDYVRAVQSIKATIAERANAFRQQCELTETIKLKEIDLNKFRLTRSEKLAEAEREYEVLKADSEEATRRFETIVRLMNEEIVRFQEQKTLDLGIAFHEFAKGQARLARGIADAWRSLLPKLEACS…
CsATG20d	CSS0048654.1	MISQQRSLSGSSQSPRSPSSQPFLSVSVTDPAKMGNGVQAYISYKVITKTNLPEYQGSEKIVIRRYSDFEWLRDRLFEKYKGIFIPPLPEKSTVEKFRFSAEFIEMRRQALDVFVNRIASHHELQQSEDLRTFLQADEQTMERARSQETGIFKKKPADLMQIFKDVQSKVSDVVLGKEKPVEESNPEYEKLKHYIFELEDHLAEAQKHAYRLVKRHRELGQSLSDFGKAVKLLGTCEGDALGKVFSELGAKSEILSIKLQKEAHHLLMNFEEPLKDYVRAVQSIKATIAERANAFRQQCELTETIKLKEIDLNKFRLTRSEKLAEAEREYEVLKADSEEATRRFETIVRLMNEEIVRFQEQKTLDLGIAFHEFAKGQARLARGIADAWRSLLPKLEACS…
CsATG101	CSS0024932.1	MNCEVCQLKELELEHFEISEVLRCILHTILFHRALGLVRPKDIDLELFEITYVQCGDVELEKKIDEKIGQFIDRVEKHPSKKNQICLSFYEMKNKQATWFSNKVERLYWEQWFINLNVVQHSKAHSGKSHHSKFVVDPGESALDERSHRRAALEASLREVLFQIIKFVNEKKDHVPPIPNLEGVSFPYEITVSSSSDSAFGMDMFKRMLQTGHPTMLS*
CsATG6	CSS0011474.1	METSNNIADKGQPLRVDPNLPRWVCHNCRHNLCIAGVDSYSDKFFNDFSPRSGMQGSSVHGAGSVLGSTHMDHSFVVLPKQRNKALGVPPCPRGGGVQTDASQSGKALEESFVVLPLPAASVYKSDGGGTHFPSQEGGTGAPMQPNNSEFHSTITVLKRVFDIATTQMQVEQPLCLECMRVLSDKLDKEVEDVNRDIKAYEACLQRLEGETRNVVSEAHFLKEKLKIEEKERKLEAAIEETEKQCEKVTAELKELELKSSRFKELEERYWHKFNNFQFQLILHQEERDSVLAKIEVSQAHLELLKRTNVLNDAFPIWYDGEFGTINNFRLGRLPNIPVEWDEINAAWGQACLLLHTMAQYFRPKFSYRIKILPMGSYPRVMDSNNITYDLFGPVNLFWS…
CsATG14a	CSS0003227.1	MTTTTRKTSSCAICDNSNLASICPVCVNYRLNEYSTTLKSLKSRRDLLYSKLSEKLVAKSKADDQLSWRVLQSEKLARLREKLRLKREQYLQGNTKIEKMSYDLKVKYELLESAMTVLERNRVEQLEKFYPNLICTQSLGHMAITSERLHKQSVVIKQICKLFPQRRVNIDGERKDGSSGQYDQICNALLPRGLDPHSIPSKELAASLGYMVQLLNLVVHSVAAPALHNSGFAGSCSRIWQRDSYWDACPSSRSNEYPLFIPRQNSCTVSGETSWSDRSSSNFGVASMESDRKAHLDSSRSSSFNYSSASPHSVETHQDLQKGISLIKKSVACVTAYCYNSLCLDVPAEASTFEAFAKLLATLSSPKEVRSVFSLKMACSSALCPTYDNDKRGNLLGVF…
CsATG14b	CSS0006833.1	MMTRKTSSSCAVCETSNLASICALCVNYRLNEYSTTLKSLRSRRDLLYLRLSEVLVAKGKAEDQLSWRVLQNEKLAGLREKLQSSREQYSQGKGKVEKMSYDLKVKYELLESARTTLERNRVEQLEKFYPNLIYTQSLGHMAITSERLHKQSVIIKQICKLFPQRRVNIDGERKDGCSGQYDQICNARLPRGLDPHSIPSEELAASLGYMVQLLNLVVHNVAAPALHNSGFAGSCSRIWQRDSYWDACPSSRSNEYPLFIRRQNSCSTGGETSWSDRSSSNFGVASMESERKTRLDSSGGSFNFSSASPHSVEMHQDLQKGISLLKKSVACLTAYCYNSLYLDVPTEASTFESFAKLLATLSSSKEVRSVFSLKMESSRSSKQVQQLNKSAWNVNSVIS…
CsVPS15a	CSS0000434.1	MGNKIARTTQASATEYYLHDLPSSYNLVLKEVLGRGRFLKSIQCKHDEGLVLVKVYFKRGDSIDLRDYERRLSQIREIFRGLEHPHCWPFQIWLETDKAAYLLRQYFLNNLHDRLSTRPFLSIVEKKWLAFQLLYAVKQSHEHGVCHGDIKCENVLVTSWNWLYLADFASFKPTYIPHDDPSDFSFFFDTGGRRRCYLAPERFYEHGGEMQVAQDAPLKPSMDIFAVGCVIAELFLEGQPLFELSQLLAYRRGQYDPSQNLEKIPDSGIRKMIIHMIQLDPELRFSAESYLQSYASVVFPSYFSPFLHNFYSCLNPLDSDTRVVMCQTVFQEIHKQMMNNRSNEETGIGVGTQSNTIGGQSSQQMDTKQGFDLTEDSLRKKEEVEKGSVDDRLELLGDI…
CsVPS15b	CSS0026223.1	MGNKIARTTQASATEYYLHDLPSSYNLVLKEVLGRGRFLKSIQCKHDEGLVLVKVYFKRGDSIDLRDYERRLSQIREIFRGLEHPHCWPFQIWLETDKAAYLLRQYFLNNLHDRLSTRPFLSIVEKKWLAFQLLYAVKQSHEHGVCHGDIKCENVLVTSWNWLYLADFASFKPTYIPHDDPSDFSFFFDTGGRRRCYLAPERFYEHGGEMQVAQDAPLKPSMDIFAVGCVIAELFLEGQPLFELSQLLAYRRGQYDPSQNLEKIPDSGIRKMIIHMIQLDPELRFSAESYLQSYASVVFPSYFSPFLHNFYSCLNPLDSDTRVVMCQTVFQEIHKQMMNNRSNEETGIGVGTQSNTIGGQSSQQMDTKQGFDLTEDSLRKKEEVEKGSVDDRLELLGDI…
CsVPS34	CSS0036353.2	MPGTKPLNSAEVDFTIEERRPELYVECALHIDGAPFGLPTRTRLESVGPTYCWNELITLSTKYRDLTANSQLALTVWDVSCGKTEGLIGGATISLFNTKKQLKTGRHKFRLWPRKEADGSIQTTTPGKVPKEERGELERLEKLVNKYERGQIQRVDWLDRLAFKAMDKIKERESGRNGSCLYLVVEFCSFEHRVVFQESGANFLIPSPITTSNELVTVWDPEVGKINPSEHKQLKLARSLTRGIIDRDLKPSSSERKSIQRILKYPPTRILSGDERQLLWKFRFSLMSEKRALTKFLRCVEWSDVQEAKQAVELMGRWETIDVCDALELLSPVFESEEVRAYAVSILERADDEELHCYLLQLVQALRFERSDKSRLSHFLVQRSLCNIELASFLRWYVA…
CsVPS35a	CSS0042556.1	MISNGVEDEEKWLAAGIAGLQQNAFYMHRALDSDNLRDALKYSAQMLSELRTSRLSPHKYYDLYMRAFDELRKLEMFFREENRRGCSIIDLYELVQHAGNILPRLYLLCTVGSVYIKSKEAPAKDVLKDLVEMCRGIQHPVRGLFLRSYLSQISRDKLPDIGSEYEGDADTVVDAVEFVLQNFTEMNKLWVRMQHQGPVWDKERREKERSELRDLVGKNLHVLSQIEGVDLDMYRDTVLPRILEQVVNCKDDLAQYYLMDCIIQVFPDEHHLQTLETLLAACPQLQPSVDIKTVLSRLMERLSNYAASSPEMLPEFLQVEAFAKLNNAIGKVIEAQVDMPIAGAVTLYSSLLTFTLHVHPDRLDYVNQVLGACVKKLSGKGKLDDSRATKQIVVLLSAP…
CsVPS35b	CSS0032290.1	MIANGIEDEDKWLAEGIAGIQHNAFYMHRALDSNNLREALKYSAQMLSELRTSRLSPHKYFELYMRAFDELRRLEIFFKEEDKHGCTVSDLYELVQHAGNILPRLYLLCTVGSVYIKSKDAPAKDVLKDLVEMCRGVQHPIRGLFLRSYLAQVSRDKLPDIVSEKEGDAETIMDAVEFVLQNFIEMNKLWVRMQLQGPVPVKEKRDKERSELRDLVGKNLHVLSQIEGVDLEMYKDTVLPRVLEQVFPDEYHLQTLEAVPAVDVKTVLSRLMERLSNYAASSPEVLPEFLQVEAFAKLSSAIGKVIEAQVDMPIVGAITLFVSLLTFTLRVHPDRLDCVDQVLCVKKLSGKAKLEDSKATKQVVALLTAPLEKYNDIVTALTLSNYPRVMDYLDNGTNK…
CsVPS35c	CSS0017701.1	MISDGIEDEEKWLAAAIAGLQQNAFYMHRALDSNNLRDALKYSAQMLSELRTSRLSPHKYYELYMRAFDELRKLEMFFKEEARRGCSIIDLYELVQHAGNILPRLYLLCTVGSVYIKSKEAPAKDILKDLVEMCRGIQHPVRGLFLRSYLSQISRDKLPDIGSEYEGDADTVMDAVEFVLQNFTEMNKLWVRMQYQGPSREKERREKERSELRDLVGKNLHVLSQVEGVDLDMYRDTVLPRVLEQVVNCKDDLAQYYLMDCIIQVFPDEYHLQTLETLLGACPLLQPSVDIKTVLSRLMERLSNYAASSAEVLPEFLQVEAFAKLNNAIGKVIEAQVDMPIAGAVTLYSSLLTFTLHVHPDRLDYVDQILGACVKKLSGKGKLDDSKATKQIVALLSAP…
CsVPS35d	CSS0029031.1	MISDGIEDEEKWLAAAIAGLQQNAFYMHRALDSNNLRDALKYSAQMLSELRTSRLSPHKYYELYMRAFDELRKLEMFFKEEARRGCSIIDLYELVQHAGNILPRLYLLCTVGSVYIKSKEAPAKDILKDLVEMCRGIQHPVRGLFLRSYLSQISRDKLPDIGSEYEGDADTVMDAVEFVLQNFTEMNKLWVRMQYQGPSREKERREKERSELRDLVGKNLHVLSQVEGVDLDMYRDTVLPRVLEQVVNCKDDLAQYYLMDCIIQVFPDEYHLQTLETLLGACPLLQPSVDIKTVLSRLMERLSNYAASSAEVLPEFLQVEAFAKLNNAIGKVIEAQVDMPIAGAVTLYSSLLTFTLHVHPDRLDYVDQILGACVKKLSGKGKLDDSKATKQIVALLSAP…
CsATG2	CSS0011349.1	MFQWNIAKSAEAMFSRWAIKRVCKFLLKKKLGQLILGDIDLNQLDVQLSAGTIQLSDLALNVDYLNQKFGAAAAVLVKEGSIGSLLVTMPWKGKGCEIEVDELELVLAPCGELNSSETCIPRQNVSHDSGKLEHEKVENSMMSTSVDVHEGVKTIAKMVKWLLTSFRVKVKKLIVAFDSSLVQNEKNAGFHRTLVLRITEVESGTRISKEVASNADATADNFLGLNQLTSFVKFQGAILEFLQMDGVDNQTLLPCASGTTFGERFSVCCPSNARTPIVTGEGGGFSGTLKLSIPWTNGSLDIRKVDADAYIDPLELRFQPSSIKWFLYLWEILKDSGKNDKGHADCNMTESVYFNAPSPSMLGSFVNSTYKVMPCNESSSTDFGYSIGKETGTDALLPE…
CsATG9a	CSS0019197.1	MFSGAKGAKAFNIFKWKRRGESSLTTGFLDDVHHEIELSDYQRAPSPGSESPSGLLNGEGLNAEPIADLDLFFERLYSYYCEKGLWCIIIKWIVELLSLVFTICFSGFFLLYVDWNGLRNAKCGMDAVESGIKPCDLAKEALHPHPLIPFTLSKAIIVGYLGIFSVYWAFCFLRFFAQLKDTLKIRQFYYNSLCVTDNEIQTMPWASILEKVVRLQSTQQLCVVKDLSAHDVVMRLMRKENYLIGMLNKGVLAFPISQWVPGSSPSVKFGPNGTRYRLILTKTLEWTLNWCILQSMFDRNFCVRRDFVSDPKTLKKRLMIVGLAMLLLSPFLVIFMLVYLFLRHAEQFYNQPSTASSRRWSNLSKWMFREFNEVDHFFKHRINGSVLHASDYLKQFPSP…
CsATG9b	CSS0024912.1	MGGCVTSPNLALVGEVLYKTKLLNFCVQRDFVSDPKTLKKRLMIVGLAMLLLSPFLVIFMLYYNQPSTASSRRWSNLSKWMFREFNESVVLSVANFVFYFLFHLFLLFFFFLSFFCSSSSALLLLLFLLLLFFFWVTFQYSHRTPAM*
CsATG18a	CSS0016079.1	MAHNLPPSPPDSPSSTTTTPPNPNPNPTLLHLSFNQDSRYFAAGTNRGFRIYNCDPFREFFRREFDGGGGIGIVRMLFGFNISALVGGGSEPQYPSNKVMIWDDNEGRCIVELSFRSEVKSVRLRRDRIVVVLNQKIFVYNFSDLKLFHQIETAPNPKGLCEVSQLSGSMVLVCPGLQKGQVRIEHYALKRSKYVVAHDSRIACFALTHDGRLLATASSKGTLVRIFNTLDGSLLQEVRRGADRAEIYCLAFSSSAQWLAASSAKGTVHVFRLKLDSGSLGIERSRRASEPNLSTAPAVSSLSFIKVAGIKWLLKKFAIRDFSATINNIKFLFRKP*
CsATG18b	CSS0018567.1	MANQSSSSSYPILCASFNQDNSCFAIATRDGFKIFDANTGRLCYERAIGAFVIVEMLYASSLLAIVGAGEQASLSPRRLCLFNITTGNALRDLNFLTSILAIRVNRKRLVVILQEKTYIYDINSLDILDTIDTVPNFKGLCAFSPSLDGCFLALPASTTKGSVLVYNVMERHSHCEIDAHCSPLAAMVLSSNGMYIATASEQGTIIRVHLVSDATKSYSFRRGTYPSTIFSLSFGPSMQLPDILVATSSSGSVHAFPLGFALNQRSRRPSSFLGSIIPESVNDASAHHHVLHNASPARVKSYAVIRKVDKVAESSMSESAAYRAIISLITYRGYFLEYSLSINHQNESSWILEREFNLLTVISERVNS*
CsATG18c	CSS0012069.1	MLTSIHSSPMSSTVSTSRGILPPARLDTCESGVSGPFSQIEPGFNDNDETELLFVSWNQDYGCFAAGTSRGFRIYNCDPFKETFRRDLKNGGFGIVEMLFRSNILALVGGKANSQYPPNKVIIWDDHQSRCIGEFSFRSEVRAVKLRRDRIVVVLEHKIYVYNFMDLKLLHQIETLANPRGLCCLSQNLNTSVLACPGLRRGQVRIEHFGLNMTKLINAHDSQIACLNLTMDGLLLATASTKGTLIRIFNTMDGTRLQEVRRGVEKADIFSIALSPNVQWLAVSSDKGTVHLFSLRVRVVGEDSATCSSAVQSPAMVSHNSSSSLDALISPSTSANPGSSLSFMKAFGSQNTIIIVGMDGSFYRCSFDPVNGGEMLQQEYVRFLKTDNRPK*
CsATG18d	CSS0018737.1	MATLSAFSSSSWPNPNPSSNLHSLPQPDHTDYSHIATNLPPPPMGTTEDEDDGPLFNQSTLLQNPNSNFPNRPSLFAPTLLHVSFNQDYGCFATGTDRGFKIYNCDPFREIFRRDFHHGGIGTVEMLFRCNILAIVGGGPDPQYPLNKVMIWDDHQSRCIGELSFRSEVRGVRLRRDRIAVVLEQKIFVYNFSDLKLLHQIETIANPKGLCAGFAGRWIAFRVEHYASKRTKFIMAHDSRIACFALTPDGHLLATCSTKGTLVRIFNTFDGSLLQEVRRGADRAEIYSLAFSSTAQWLAVSSDKGTVHVFGLKANLGNLGSDKSHGASDPNHAVSSPTSSLSFIKGVLPKYFSSERSVAQFRLLEGSQYIVAFGHQKNTVVILGLDGSFYRCQFDPVSG…
CsATG18e	CSS0049303.1	MATLSAFSSSSWPNPNPSSNFHSLPQPDHTDHSHIPTNLPPPPMGTTEDEDDEPLPNTHPQSTLLQNPNPNFPNRPSLFAPTILHVSFNQDFGFGCFSTGTDRGFKIYNCDPFREIFRRDFHHGGISTVEMLFRCNILAIVGGGPDPQYPLNKVMIWDDHQSRCIGELSFRSEVRDVRLRRDRIAVVLEQKIFVYNFSDLKLLHQIETIANPKGLCAVSQAGGSLVLVCPGLQKGQVRVEHYASKRTKFIMAHDSRIPCFALTPDGHLLATCSTKGTLVRIFNTFDGSLLQEVRRGADSAEIYSLAFSSTAQWLAVSSDKGTVHVFGLKANLGNLGSDKSHGASDPNHAVSSPTSSLSFIKGVLPKYFSSEWSVAQFRLLEGSQYIVAFGHQKNTVVIL…
CsATG18f	CSS0026650.2	MRNDGKKPQGLVPRPGRTNGLIPTSFRALSSYLRIVSSGASTVASTVKSAASAASAIVDRDNNDASHDQVLWAGFDKLECKGGITRQVLLLGYRSGFQVWDVEEADNVRDLVSRHDGPVSFMQMLPKPIASKIIGDKFVDSRPLLAVRTDVLSGVRDTIATPYNGSTSNCHDPLNGGLMPTVVSFYSLRSQSYVHELKFRSVVYSVRCSTRVVAVLQAAQIHCFDAATLEREYTLLTNPIVTGCSGFGGIGYGPLAVGPRWLAYSGSPVAVSNAGRVCPQHLTPSASFSGSSSNGSLVAHYAKESSKQLAAGIVTLGDMGYKKLSRYYSELLPDSNNSAQSGSPGLKINGTVNGHFPDAENVGMVIVRDIVSKAVITQFRAHKSPISSLCFDPSGMLLV…
CsATG18g	CSS0021708.1	MKKGKGKNSGLLPNSLKIISSCIRTVSTNASTVVRSAGASVAASITASSDDRKDQVTWAGFDKLEFGPNAFKHVLLLGYQNGFQVFDVEDASNLSELVSKRDGPVTFLQMLPVPTKCDGDEGFRSSHPLLLVVAGDEPNSSSLGQTSGHLRDSGRDGTLEPQSGNYVNSPTAVRFYSLRSNCFVHALKFRSTVCMVRCSPRIVAVGLATQIYCIDALTLENKFSVLTYPVPQFGGQGMVGVNFGYGPMAVGPRWLAYASDNPLVVNMGRLSPKNLTPSPGVSPSTSPSSGSLMARYAMESSKQLAAGIMNLGDMGYKTLSRYCPDGSSSPVPSSSGWKVSKLAASETENTGMVVIKDFVSRAVISQFRAHTSPISALCFDPSGTLLVTASVHGNNINIF…
CsATG18h	CSS0039456.1	MKQTLESSRTKQPNTTTNGFIPHSLRFISSCIKTVSSNVRSAGASVAGSISGDSDEQHKDQVLWASFDKLELGPSSTKRVLLLGYSNGFQVLDVEDASNFSELVSRRDDPVTFLQMQPIPEKSEGREGFRTSHPLVLVVASDETRSSGPMQHGRDVLVRDGYIEPQMDNLLNSPMGVRFYSLKSHNYVHVLRFRSTVHMVRCSPRIVAVCLSAQIYCFDALTFESKFSVLTYPVPQLGGPGLVGVNNGYGPMAVGPRWLAYASNNPLSSNTGRLSPHSLSPSPGVSPSTSPGSGNLVARYAMESSKQLAAGLMNLGDMGYKTLNKYYHELVPDGSGSPISSNSGRKVGRATSQSTETDTAGTVVIRDYVSRDVVSQFRAHTSPISALCFDPSGTLLVSA…
CsATG18i	CSS0024395.1	MLPSTAADEDVQNPNIPDRPSLPLPSLLHVAFNQDSGCFATGTDRGFKIFNCDPFREIFRRDFDHGSGIGTVEMLFRCNILALVGGAHDPQYPLNKVMIWDDHQSRCIGELSFRSEVRGVRLRRDHIVVVLEQKIFVYSFSDLKLLHQIETMANPKGLCVVSQSAGSIVLVCPGLQKGQVRVEHYSSKRTKFIMAHDSRIACFALTQDGHLLATASTKGTLVRIFNTFDGSLLQEDRAEIYSLAFSSTAQWLAVSSDKGTVHVFGLKVNLGNLGSDKSHGASDLSRSVSSPTSSLSFIKGKFPIGTIAEIAVIKMMERNWINTIK*
CsATG18j	CSS0027759.1	MAHNLPSSPPDSPSSTTTTPPNPNPNPTLLHLSFNQDSRYFAAGTNRGFRIYNCDPFREFFRREFDGGGGIGSVRMLFGFNISALVGGGSEPQYPSNKVMIWDDNEGRCIVELSFRSEVKSVRLRRDRIVVVLDQKIFVYNFSDLKLFHQIETAPNPKGLCEVSQLSGSMVLVCPGLQKGQVRIEHYALKRSKYVVAHDSRIACFALTHDGRLLATASSKGTLVRIFNTLDGSLLQEVRRGADRAEIYCLAFSSSAQWLAASSAKGTVHVFRLKLDSGSLGIERSRRASEPNLSTAPAVSSLSFIKGVLPKYFSSEWSLAQFHLQEGCNYIVAFGHEKDTVVILGMDGSFYRCQFNPVAGGEMTQLEYHNVLKPEESS*
CsATG18k	CSS0017985.1	MADCSPPPPSSSPPSQTLHHPDDEPQSVSVLTDMPSSLYRDLDGDGEHQQSQSDLSEDASSIISSFSEAPNPNPNNPNLSDSLSPAPSLIHLSFNQDFACFAAGTDRGFRIYNCDPFREIFRREFENGGGIGVVQMLFRCNILALVGGGSEPQYPLNKVMIWDDHQGRCIGELSFRSEVKSVRLRRDRIVVVLLQKIFVYNFSDLKLLHQIETIANPKGLCEVSHLSASMVLVCPGLQKGQVRVEHYASKRTKFVMAHDSRIACFALTHDGRLLATASSKGTLVRIFNTLDGSLLQEVRRGADRAEIYSLAFSSTAQWLAVSSDKGTVHVFSLKVDSGSLGIERTRSGPDPNLSTPSAVSSLSFIKGVLPKYFSSEWSVAQFRLQEGSQYIVAFGHEKD…
CsATG18l	CSS0018126.1	MSSTVSTSRGILPPARLDTCESGVSGPFSQIEPGFNDNDETELLFVSWNQDYGCFAAGTSRGFCIYNCDPFKETFRRDLKNGGFGIVEMLFRSNILALVGGKANSQYPPNKVIIWDDHQSRCIGEFSFRSEVRAVKLRRDRIVVVLEHKIYVYNFMDLKLLHQIETLANPRGLCCLSQNLNTSVLACPGLRRGQVRIEHFGLNMTKLINAHDSQIACLNLTMDGLLLATASTKGTLIRIFNTMDGTRLQEVRRGVEKADIFSIALSPNVQWLAVSSDKGTVHLFSLRVRVVGEDSATCSSAVQSPAMVSHNSSSSLDALISPSTSANPGSSLSFMKGVLPKYFSSEWSFAQFHLPEYTEFIAAFGSQNTIIIVGMDGSFYRCSFDPVNGGEMLQQEYVR…
CsATG18m	CSS0041525.1	MDGLLLATASTKGTLIRIFNTIDGTKLQEVCRGVEKADIFRIALSPNVQWLAVSSDKGTVHLFSLRVRVVGEDSSTCSIVVQIRQWFPTIHLPLMLLFLQGVLPKYFSSEWSFAQFHLQNTPNSLQHLDLRTLSLLLAWLGENGSSQLNKTFVLIKHITLML*
CsATG18n	CSS0005880.1	MLYASSLLAIVGAGEQASLSPRRLCLFNVTTGNCIFMCRLVVILQEKTYIYDINSLDILDTIDTVPNFKGLCAFSPSLDGCFLALPASTTKGSVLVYNVMERHSHCEIDAHRSPLAAMVLSSNGMYIATASEQGTIIRVHLVSDVTKSYNFRRGTYPSTIFSLSFGPSMQLPDILVATSSSGSVHAFPLGFTLNQRSRRPSSFLGSIIPESVNDASAHHHVLHNASPARVKSYAVIRKVDKVAESSMSESAAYRATIYLIAYSGYFLEYSLSINHQNESSWILEHEFNLLTVISERVNS*
CsATG18o	CSS0010177.1	MRNDGKKPQGLVPRPGRTNGLIPTSFRALSSYLRIVSSGASTVASTVKSAASAASAIVDRDNNDASHDQVLWAGFDKLECKGGITRQVLLLGYRSGFQVWDVEEADNVRDLVSRHDGPVSFMQMLPKPIASKIIGDKFVDSRPLLAVRTDVLSGVRDTIATPYNGSTSNCHDPLNGGLMPTVVSFYSLRSQSYVHELKFRSVVYSVRCSTRVVAVLQAAQIHCFDAATLEREYTLLTNPIVTGCSGFGGIGYGPLAVGPRWLAYSGSPVAVSNAGRVCPQHLTPSASFSGSSSNGSLVAHYAKESSKQLAAGIVTLGDMGYKKLSRYYSELLPDSNNSAQSGSPGLKINGTVNGHFPDAENVGMVIVRDIVSKAVITQFRAHKSPISSLCFDPSGMLLV…
CsATG18p	CSS0042691.2	MKKGKGKNSGLLPNSLRIISSCLKTVSTNASTVVRSAGASVAASISSASADDRRDQVTWVGFDKLEFGPTAFKQVLLLGYQNGFQVFDVEDASNFIELVSKRDGPVTFLQMLPIPAKSDSVEGFRSSHPLLLVVARDEPNSSSLGQTSGHLGGLGRDGTVEPQSVNYVNSPTAVCFYSLRCNCFVQMLKFRSAVRMVRCSSRIVAVGLATQIYCIDALTLENKFSVLTYPMPQFGGQGSVGVNIGYGPMALGPRWLAYASDNPLVSNTGRLSPKNFTPSPGVSPSTSPGSGSLMARYAMESSKQLAAGIINLGDMGYKTFSRYCPDLLPDGSSSPVSSSSGWKVSRLATSEMENAGMVAVKDFISRAVISQFRAHTSPISALCFDPSGTLLVTASVHGN…
CsATG18q	CSS0040351.1	MQPIPAKSEGREGFRTSHPLLLVVASDETGSLSPMQNGRDVRDGYIEPQSGSLLNSPTAVRFYSLRSHNYVHVLRFRSTVYMVRCSPRTVVVGPCCTSKHLIYCFDALTLESKFSVLTYPVPQLGGLGMVGINIGYGPMAVGTRWLAYASNNPLSSNTGRLSPQNLSPSPGVSPSTSPGNGSLVARYAMESSKQLAAGLMNLGDKGYKTLTKYYNDLHPDGSSSPVSSNLAWKVGRAAAQSNETDIAGTILCLNQLLSQFRAHTSPISALCFDPSGTLLVTASVHGHNINIFRIMPSQNGSGTQSYDWSSSHVHLYKLHRGMTSAVIQDICFSQYSQWVAIVSSRGTCHIFVLSPFGGETGLQIQNSHVDGPYQQSFHSPPQPATLSVVSRIRLGNSGW…
CsATG18r	CSS0016690.1	MQPIPAKSEGREGFRTSHPLLLVVASDETGSLSPMQNGRDVRDGYIEPQTGSLLNSPTAVRFYSLRSHNYVHVLRFRSTVYMVRCSPRTVVVGLAAQIYCFDALTLESKFSVLTYPVPQLGGLGMVGINIGYGPMAVGTRWLAYASNNPLSSNTGRLSPQNLSPSPGVSPSTSPGNGSLVARYAMESSKQLAAGLMNLGDKGYKTLTKYYNDLHPDGSSSPVSSNLAWKVGRAAAQSNETDIAGTVVIRDFMSKSVASQFRAHTSPISALCFDPSGTLLVTASVHGHNINIFRIMPSQNGSGTQSYDWSSSHVHLYKLHRGMTSAVIQDICFSQYSQWVAIVSSRGTCHIFVLSPFGGETGLQIQNSHVDGPSLVPILSHPWWSSSSLMISQQSFHSPP…
CsATG3a	CSS0045715.1	MVLSQKLHEAFKGTVERITNPRTVSAFKEKGVLSITEFVLAGDNLVSKCPTWSWESGEPSKRKSYLPAEKQFLITRNVPCLRRAASVEEEYEAAGGEVLLDNEDNDGWLATHGKPIENKCEEEENLPSMETLEISKKNTIQSISSYFGGDDEDIPDMEEYEEPDNLIETDPATLQCTYLVAQEPDDDNILRTRTYDVSITYDKYYQTPRVWLTGYDESRMLLQPELVLEDVSQDHARKTVTIEDHPHLPGKHASVHPCRHGAVMKKIIDVLMSRGVEPEVDKYLFLFLKFVASVIPTIEYDYTMDFDLGSSST*
CsATG3b	CSS0046772.1	MVLSQKLHEAFKGTVERITNPRTVSAFKEKGVLSITEFVLAGDNLVSKCPTWSWESGEPSKRKSYLPAEKQFLITRNVPCLRRAASVEEEYEAAGCEVLLDNEDNDGWLATHGKPKENKCDEEENLPSMETLEISKKNTIQSISSYFGGEEEEDIPDMAEYEEPDNLIETDPATLQSTYLVAHEPDDDNILRTRTYDVSITYDKYYQTPRVWLTGYDESRMLLQPELVLEDVSQDHARKTVTIEDHPHLPGKHASVHPCRHGAVMKKIIDVLMSRGVEPEVDKYLFLFLKFVASVIPTIEYDYTMDFDLGSSST*
CsATG4a	CSS0048139.1	MKGFHERTFNSKHCCKTYSDSPNRTSGSVCSEPGSSDSKLYKTSLWSGFFLSAFSTFEAHGDPKGCGKKGFGTRSNGWTAAVKRVMNGGSMRRIQERVLGLYKTGISSSTSDIWHLGLCYKISQEDSSSDLAISDGLAAFVEDFSSRILLTYRKGFAAVGDSKYTSDVNWGCMLRSSQMLVAQALIVHQLGRSWRKTSHKPLNKEYIEILHLFGDSEASTLSIHNLLQAGNGYDLAAGSWVGPYAMCRTWESLVRFKREESELEDQSFPMAIYVVSGDEDGERGGAPIVCIEDASRHCFEFSKGQANWTPILLLVPLVLGLDKINPRYIPLLSATFTFPQSLGILGGRPGASTYIVGVQDEEAFYLDPHEVQPVVDIRKDNLEADTSSYHCNVVRHVPL…
CsATG4b	CSS0004368.1	MKGFHERTFNSKHCCKTYSDSPNRTSGSVCSEPGSMPKGCGKKGFGTRSNGWTAAVKRVMNGGSMRRIQERVLGLYKTGIFSSTSDIWHLGFCDLAISDGLAAFVEDFSSRILLTYRKGFAAIGDSKYTSDVNWGCMLRSSWPDACCSGIALIVHQLGRSWRKTSHKPLNKEYIEILHLFGDSEASTLSIHNLLQAGNGYDLAAGSWVGPYAMCRTWESLVRFKREESELEDQSFPMAIYVVSGDEDGERGGAPIVCIEDASRHCFEFSKGQANWTPILLLVPLVLGLDKINPRYLVTSDAWVYLPCIENCLGILGGRAGASTYIVSMQDEETFYLDPHEVQPVVDIRRDNLEADTSSYHCNVVRHVPLDSVDSSLAIGFYCRDKDDFDDFCNRASKLA…
CsATG4c	CSS0003826.1	MKGFHERTFNSKHCCKTYSDSPNRTSGSVCSEPGSSDSKLYKTSLWSGFFLSAFSTFEAHGDPKGCGKKGFGTRSNGWTAAVKRVMNGGSMRRIQERVLGLYKTGISSSTSDIWHLGLCYKISQEDSSSDLAISDGLAAFVEDFSSRILLTYRKGFAAVGDSKYTSDVNWGCMLRSSQMLVAQALIVHQLGRSWRKTSHKPLNKEYIEILHLFGDSEASALSIHNLLQAGNGYDLAAGSWVGPYAMCRTWESLVRFKREESELEDQSFPMAIYVVSGDEDGERGGAPIVCIEDASRHCFEFSKGQANWTPILLLVPLVLGLDKINPRYIPLLSATFTFPQSLGILGGRPGASTYIVGVQDEEAFYLDPHEVQPVVDIRKDNLEADTSSYHCNVVRHVPL…
CsATG8a	CSS0047563.1	MAKSSFKLEHPLERRQAESARIREKYPDRIPVIVEKAEKSDIPDIDKKKYLVPADLTVGQFVYVVRKRIKLSAEKAIFVFVKNTLPPTAALMSAIYEENKDEDGFLYMIYSGENTFGSL*
CsATG8b	CSS0012169.1	MAKSSFKLDNPLERRQAESTRIREKYPERIPVIVEKVERSDIPDIDKKKYLVPADLTVGQFVYVVRKRIKLSAEKAIFIFVKNTLPPTAALMSSIYEENQDEDGFLYMTYSGENTFGSIQTQSV*
CsATG8c	CSS0049783.1	MAKSSFKLEHPLERRLAEAARIREKYPDRIPVIVEKAERSDIPDIDKKKYLVPADLTVGQFVYVVRKRIKLSAEKAIFIFVKNILPPTAAMMSAIYEENKDEDGFLYMTYSGENTFGSF*
CsATG8d	CSS0028585.1	MAKSFFKMEHPLERRQAEATRIREKYPDRIPVIVERADRCDIPDIDKKKYLVPADLTVGQFVYVVRKRIELSPEKAIFIFVKNILPPTAAMMSAIYEENKDEDGFLYMSYSGENTFG*
CsATG8e	CSS0008568.1	MAKSSFKSEHPLERRQAEASRIREKYPDRIPVIVEKAERSDIPDIDKKKYLVPADLTVGQFVYVVRKRIKLGAEKAIFIFVKNILPPTAAMMSAIYEENKDEDGFLYMTYSGENTFGSI*
CsATG8f	CSS0029668.1	MFDPKFAFEARMTKIYFKQEHDFEKRRAEAARIREKYSDRIPVIVEKAERSDIPNIDKKKYLVPADLTVGQFVYVIRKRIKLSAEKAIFIFVDNILPPTGAIMSTIYDEKKDEDGFLYVTYSGENTFG*
CsATG8g	CSS0035066.1	MAKSLFKQEHDLEKRRAEAGRIREKYPDRIPVIVEKAERSDIPNIDKKKYLVPADLTVGQFVYVIRKRIKLSAEKAIFIFVDNVLPPTGSIMSSIYDEKKDEDGFLYVTYSGENTFGTRFYCSL*
CsATG8h	CSS0033839.1	MSSFKQEHDFDKRRAEAARIREKYPDRIPVIVEKAERSDIPNIDKKKYLVPADLTVGQFVYVIRKRIKLSAEKAIFIFVDNVLPPTGGIMSTIYDDKKDEDGFLYVTYSGENTFGLQILH*
CsATG8i	CSS0035192.1	MSSFKQEHDFDKRRAEAARIREKYPDRIPVIVEKAERSDIPNIDKKKYLVPADLTVGQFVYVIRKRIKLSAEKAIFIFVDNVLPPTGGIMSTIYDDKKDEDGFLYVTYSGENTFGLQILH*
CsATG8j	CSS0028099.1	MAKSSFKQEHVLEKRRAEAARIREKYPDRIPVIVEKAERSDIPNIDKKKYLVPADLTVGQFVYVIRKRIKLSAEKAIFIFVDNVLPPTGGIMSAIYDEKKDEDGFLYVTYSGENTFGDQILL*
CsATG8k	CSS0013524.1	MGKMRSFKQEFSFEERSEESRDMIAKYPDRVPVVVERYSNTDLPEIEKKKYLVPRDMSVGQFIHILSCRLRLAPGKALFVFVNSTLPQTSSLMESVYKTFKEEDGFLYMCYSSEKTFGCGNSQTCGCTSL*
CsATG8l	CSS0023716.1	MGKMRSFKQEFSFEERSEESRDMIAKYPDRVPVVVERYSNTDLPEIEKKKYLVPRDMSVGQFIHILSCRLRLAPGKALFVFVNSTLPQTSSLMESVYKTFKEEDGFLYMCYSSEKTFGCGNSQTCGCTSL*
CsATI	CSS0032978.3	MADNNEGKETPTRGNEWEVVSLTASAYAAAPGPEQVELNDNDKGNAPEEDEAETSRVMFMSGHFVFPPSQHENLPVEPENIEIHNVQGIDDNVPELGADEGGRSDTKDEENWSIKGLAVPDEFPGIQCFDEKDNRLSIHGTKFDEGTTLQGLDFIENEQSLHSASKFSSFHSETTMGGSTTYFDDAVIPGQIEPSEGDLDSDISQLPKPEKEDEYDSSALPCEAWWKRRAASLYAHAKETNAFWSIFIAAAVMGLVIIGQRWQQERWQVLQLKWQFNISDEKMGRMLGPISRFKDVIVGGSRRGSSIRGTSSSQR*
CsNBR1	CSS0041144.1	MESTIVIKVKYGETLRRFNARVTEAGRLDLDMGGLREKVLSLFNFASDVDLTLTYIDEDGDIVTFVDEEDLHDVMRQSLNPLRISVKLNSDKGGRSYTRSSGSSTPMRSPGVQYPLPNWNSTVSEFLKSVPEPFREALSKLSLDFVSRPASSTPGLAELFDSFSKLGQSYINPLSEFQAGTESSAHSGAAGNPMGASMTKGPEASKDDGATSEAMPNTKFEEPTYKTKASKDDGTTSEVMPNTKSEEPTCKTNKKVDLGKGIKDVDASVTPTSGPMNLNASLPGDSFPSGFMSANPASVDAFCGSKEEVNMPRDRKAKGIEWENFKSVESNFPTSDNKEVRKSIEPWKSVGSGFFASTADSKRNSAMDSKNTNLGGSTSTTMFPNLNLINECPFAGIPV…
CsATG5	CSS0031022.1	MDRGTEAQKYVWEGAIPLQIHLHDSEVTTLPPPPPASGSHFSTFLSSDFILAPRIGYLPLLVPHIKPFFSSALPPGVDTVWFEYRGLPLKWYIPTGVLFDLLCAEPERPWNLTVHFRGYPANILIPCEGEDSVKWSFINSLKEAAYIINGNCKNVMNMSQSDQVELWHSVMNGNLEAYLRVSSKLKLGIGGDEFSVKLNSSSLKSQQSTVETDTTGSVNTGRIPVRLYVCNVHEDFDDLEDAPIIDSWDKISYINRPVEIHGEGKCFTLLDALKTLLPEFFAEKSSINEEISRAEVEDEQRLPSEEGSSARTAEEAGETLCEQVESCILSDNVEIKLLRIQGIEPKLEIPFAWLVNNLMNPERFLHICVYVRVLEPITI*
CsATG10	CSS0005940.1	MVSNGAKIDILTWDGTLSSSDFCAAALAFTEKWKRFNSTTLSQWSWVPCLKCPWIAAHEAEGYLSLENVFLPRSGEVRSYDHEVHRYDFHIVYSSSYKVPVLYFRAYRSDGQPLVLDDIEKDLPANSAKVLMESKWTFITQEEHPYLNRPWHTLHPCGTSEWMKLLFITDASQAKGGVAFEKYLVSWLSVVGQVVRLRIPFEMLSDSGQL*
CsATG12a	CSS0011852.1	MASESPSSARKVVVHLRATGDAPILKQAKFKIAGTDKFAKVIDFLRRQLHRETLFVYVNSAFSPNPDELVIDLYKNFGFDGKLVVNYACSMAWG*
CsATG12b	CSS0028385.1	MASESPSCARKVVVHLRATGDAPILKQAKFKIAGTDKFAKVIDFLHRQLHRETLVDDFLSFIFFLPLFLLNH*
CsATG16a	CSS0041467.1	MGGVTSSMAAKFAFFPPSPPAYKLITDDATGLLLLDPFPHRENVEVLKLPTRRGTEIVAVYVRYPMASSTLLYSHGNAADIGQMYDLLLELSIHLRLNIMGYDYSGYGQSTGKPSEQNTYADIEAAYKCLEESYGAKQEEIILYGQSVGSGPTLDLAVRLPRLRAVVLHSPILSGLRVMYPNIDKIPLVKCPVLIIHGTSDEVVDCSHGKQLWELCEEKYEPLWLKGGNHCDLELFPEYIRHLRKFVSTVEKSPSQRISSRKSVDRPEHSRKSTDCFEVPRKSTDRREKPRRSTDKSEKLKIHEYKFNHNDKLAKVRLSVEQMERSRRSVEYHEKSRRSIDQQLERARKSVDWLDRIRAGSTPLVPRVNPCPLHTSVSRLFFLKGRPLGFVLGHRWRMA…
CsATG16b	CSS0006108.1	MESSKSLSFFQDIRSREVNGFRVRKRPYPDNDLSKFTQTGAVVVEHNGDHRPPMALSFCKTSKNSHIIAVTDEDGVDEWVAHENAIFDVCWIKEDNNILTASGDHSIKVWDAQEKKCIATLLGHRGSVKSICSHPTNPDLVVSGARDGSFMLWDLRCSRGRNGKLFVISPDEVREAHISPHRRRGRRCKAASVSITSVLYLKDEISVATAGAVDNVVKFWDIRNLKGPVIQACPSHELSTEKERRLHGISSLSQDLNGVYISASCMDNRIYLYNVLQLEKGPVKSFSGCRIESFFVKSALSPDAAHILGGSGDGNAYIWQVNKPQANPLVLKGHDGEVTAVDWCQSEVGKIATSSDDFTVCFWNIQNSCYSSTRSPSSIRRRVIALPTMECRKLFMDEE…
CsATG16c	CSS0036222.1	MESSKSLSFFQDIRSREVNGFRVRKRPYPDNDLSKFTQTGAVVVEHNGDHRPPMALSFCKTSKNSHIIAVTDEDGVDEWVAHENAIFDVCWIKEDNNILTASGDHSIKVWDAQEKKCIATLLGHRGSVKSICSHPTNPDLVVSGARDGSFMLWDLRCSRGRNGKLFVISPDEVREAHISPHGRRGRRCKAASVSITSVLYLKDEISVATAGAVDNVVKFWDIRNLKGPVIQACPSHELSTEKERRLHGISSLSQDLNGVYISASCMDNRVLLNLFSGCRIESFFVKSALSPDAAHILGGSGDGNAYIWQVNKPQANPLVLKGHDGEVTAVDWCQSEVGKIATSSDDFTVCFWNIQNSCYSSTRSPSSIRRRVIALPTMECKKLFMDEEPAGLEKGSASS…
CsATG16d	CSS0028462.1	MSTLEIEARDVIKIVLQFCKENSLHQTFQTLQNECQVSLNIVDSLETFVADINSGRWDAILPQVAQLKLPRKKLEDLYEQIVLEMIELRELDTARAILRQTQVMGVMKQEQPERYLRLEHLLVRTYFDPHEAYQDSTKEKRRAQIAQAVAAEVSVVPPSRLMALIGQALKWQQHQGLLPPGTQFDLFRGTAAMKQDVDDMYPTTLGHTIKFGKKSHPESTRFSPDGQFLVSCSVDGFIEVWDHISGKLKKDLQYQADETFMMHDDAVLCVDFSRDSEMLASGSQDGKIKVWRIRTGQCLRRLERAHSQGVTSLVFSRDGTQLLSTSFDSTARIHGLKSGKLLKEFRGHTSYVNDAIFTSDGSRVITASSDCTVKVWDVKTTDCLHTFKPPPPLRGGDAS…
CsATG16e	CSS0029758.1	MKMASLTQLDDEIVRSMSIGAVFSDFVGKINSLDFHRTADLLITACEDDSVRLYDIATAKLLKTTYHKKHGADRICFTHHPSSVICSSRYNLDSTGETLRYLSMYDNRCLRYFKGHKDRVVSLCMSPVNDSFMSGSLDHTVRIWDLRVNACQGILHLRGRPTVAYDQQGLVFAMSMEGGAIKLFDSRSYDKGPFDTFLVGGDMAEICDIKFSNDGKSMLLTTTSNNIYVLDAYGGEKRCAFSLDPSPNATIEAAFTPDGQYVVSGSGDGSLYAWSIRTKNKVASWDSHIGIASCFKWAPRRAMFVAASSVLTFWIPNNSKPATEFGTVNPEAVGQSEHISQ*
CsATG16f	CSS0020323.1	MMQTLPREGENALSVVGPRPMEWSTVPYSGPPAPGANGKQRTSSLESPIMLLTGHQSAIYTMKFNPAGTVIASGSHDKEIFLWNAFGECKNFMVLKGHKNAVLDLQWTTDGSQIISASPDKTLRAWDVETGKQIKKMAEHSSFVNSCCPSRRGPPLVISGSDDGTAKLWDMRQRGAIQTFPDKYQITAVSFSDASDKIYSGGIDNDVKVWDLRRNEVTMTLQGHQDMITGMQLSPDGSYLLTNGMDCKLCIWDMRPYAPQNRCVKILEGHQHNFEKNLLKCGWSPDGSKVTAGSSDRMVYIWDTTSRRILYRLPGHTGSVNECVFHPIEPIIGSCSSDKQIYLGEISTATAPQFH*
CsATG16g	CSS0022544.1	MDLLQSYADTDMDDDNQQFQQLQPQPQPQPQPPSIQNPSSTASDHSSSPDSSPPRISLPSKSSAPKVDDTMLALTIADSNRALTKPLDPSQHVVVFNPTYDQLWAPIYGPSHPYAKDGIAQGMRNHKLGFVENAAIEPFVFDEQYNTFHKYGYAADPEGNNYVGDLDRLKETDGISVYNIPQHEQKKRKLEKKKESVENEEEGSGEVERVEVDNPASETWLLKNRKSPWAGKKEGLQVELTEEQKKYAEDGNSEKGEVVADKSTFHGKEERDYQGRSWIAAPKDAKATNDHCYIPKRLVHTWSGHTKGVSAIRFFPKHGHLILSAGMDTKVKIWDVFNSGKCMRTYMGHSKAVRDIWFCNDGSKFLTAGYDKNIKYWDTETGQVISAFSTGKIPYVVRL…
CsATG16h	CSS0037916.1	MAEQAIEKSSSEAETKKKKDDLTDPEFFSCVLQPSPADSDADYIGIRRLLLHHKAQSGVLRRKDWRCNGKGYLAFRNYINRPRNWESLHIPSHPSTPGQSGRWISSPGPLSLSFEMDSWIIVQSFGSKASNASDGDHPRRKAEPGYSFVGMHCIFDQCKAMVTVVKFGQMSSDLLAYGASDGTLTVCTVSDPPAVLNQLIGHSKDVTDFDFTSNNQYIASSSMDKTARIWEISKGLCIRVIYGLSPQLCIRFHPVNNNFLSVGNANKEITVFNFSTGRVINKTVFDNEVTAMDHDHTGQLIFCGDAQGCVYTVSVNSHTGVLSRSHRNRNGSKRKSPVTTVQYRTFSLLARGPVLLTFTRDGTLMRKLHFGFCSVSLEVQGYLTLRCSLKLAPRLHSIR…
CsATG7a	CSS0045323.1	MSGNEHGSVLQFAPFQSFVDEGFWHRLSSLKLNKLGIDESPIPITGFYAPCSHSQVSNHLTLLAESFPPEPSEQSLVTTTSRGNRNRCSVPGILFNTNTLEGFHALDKQSLLKSEANKIWEDIHSGKAEEDSAVLSRFLLISFADLKKWSFHYWFAFPALVLDPPATLVDLRPASQWLSLEEAESLSAACNEWRNSSATADVPFFLVSIASNSHATIKHLKYWESSQHDGHKFLFGFYDPCHLPSNPGWPLRNFLALICSRWNLKKIHFFCYRENRGFADLSLSLIGEALITDGKIDQHIPNAVGWELNRGKKVPRCISLSKSIDPTRLAISAADLNLKLMRWRALPSLNINILSATKCLLLGAGTLGCQVARMLMAWGVRKITLLDSGKVAMSNPLRQ…
CsATG7b	CSS0049485.1	MSGNEHGSVLQFAPFQSFVDEGFWHRLSSLKLNKLGIDESPIPITGFYAPCSHSQISNHLTFLAESFPPEPSEQSSVTTTSRGNRNRCSVPGILFNTNTLEGFHALDKQSLLKAEANKIWEDIHSGKAEEDSAVLSRFLLISFADLKKWSFHYWFAFPALVLDPPATLVDLRPASQWLSLEEAESLSAACNEWRNSSATADVPFFLVSIASNSHATIKHLKYWESSQHDGHKFLFGFYDPCHLPSNPGWPLRNFLALICSRWNLEKIHFFCYRENRGFADLSLSLIGEALITVSQGWKDDQHIPNAVGWELNRGKKVPRCISLSKSIDPTRLAISAADLNLKLMRWRALPSLNINILSATKCLLLGAGTLGCQVARMLMAWGVRKITLLDSGKVAMSNP…
CsATG7c	CSS0029481.1	MKKGNENGSVLQFTPFQNAVDEGFWHRLSSLKLNLFGSDDSPISITGIYLYLCFFISSPNLIFFLFFFNFQFSSIAPCSHSQLSNPLTLCAESLPPEPCVQLSITRSRGDRNKCSVPGILYNTNTLEGFQALDKQSLLSRFLLISFADLKKWTFHYWFAFLSLSLDPPAELVSAACNEWRSSSATHLKDWDSYQHDSHKFLFGFYDPCHLPSNPGWPFCNFLAFIWKKLLRCISLAKSMDLLAILAADLNLKLMRWRALPSLDLNTFSGRYTWMPGCSDAYGEPWHLGMPIAFDNTVQKITLLDSGRVAMFNLLRQSLYTLDDCLNGGEFKATAAVKSLEKIFPAVEAEGVVMAIPMPGHLVPSHEENIVLEDCKHLHDLVDCHDAVFLLTDTRESRWL…
CsVTI12a	CSS0037762.1	MSQVFEGYERQYCELSANLSRKCNSAGLLPDGEEKMQKISEIKTGVDEADVLIRKMDLEARSLQPSLKAVLLAKLREYKADLNKVKREVKKISSNDANQVREELLKSGIADAHVISVDQRERLAMSTERLNQSSDRIKESRRTTLETEELGVSILQDLHNQRETLLHSHKKLHGIDDAREKPFCRNCRGRRLGSLGFEVGLLL*
CsVTI12b	CSS0046310.1	MSQVFEGYERQYCELSANLSRKCNSAGLLPDGEEKMQKISEIKTGVDEADVLIRKMDLEARSLQPSLKVVLLAKLREYKADLNKVKREVKKISSNDANQVREELLKSGIADAHVISVDQRERLAMSTERLNQSSDRIKESRRTTLETEELGVSILQDLHNQRETLLHSHKKLHGIDDAREKPFCRNCRGRRLGSLGFEVGLLL*
CsVTI12c	CSS0042754.1	MSQVFEGYERQYCELSANLSRKCNSAGLLPDGEEKMQKISEIKTGVDEADVLIRKMDLEARSLQPSLKAVLLAKLREYKADLNKVKREVKKISSNDANQVREELLKSGIADAHVISVDQRERLAMSTERLNQSSDRIKESRRTTLETEELGVSILQDLHNQRETLLHSHKKLHGIDDAIDKSKKVLTSMSRRISRNKLIVGSVIAVLVLVIMLILYYKLSHH*
1Protein sequences from https://www.Arabidopsis.org/
2Protein sequences from http://citrus.hzau.edu.cn/orange/
3Protein sequences from http://plants.ensembl.org/index.html
4Protein sequences from http://tpia.teaplant.org/index.html

## Sheet: Supplementary Table 5
Supplementary Table 5. Primer sequences used in this study
Gene	Accession number	Primers sequences ( 5’→3’ )
		F	R
Primers used for qRT-PCR
AtAMT1;1	At4g13510	CATAACTGGTGGCTGCTC	TTTGTTGCCGTAAATCTG
AtAMT1;2	At1g64780	AGTCTCGCACTGGTTCTG	CTACCTATTCTTGGTCCTTC
AtAMT1;3	At3g24300	TGTAGGATGGGTTAGTGC	TAGCTGATCGAGGGAAA
AtNRT1;1	At1g12110	AAATCGTGCGAATGTTAC	ATAGACGGCGGTGGTTAG
AtNRT2;2	At1g08100	TCGTCACTGCCGTTGTA	CACGTTAGCCCTTCTTCA
AtAAP1	At1g58360	GCATCGCTGTCCACCTTATTG	CTTGTTGTCTGGATAGTTTCTGTTGC
AtAAP4	At5g63850	CGTACAAAGTCAACGTTTTCAGAGC	ACTCCATCTCTCAACCTTCCTCTGTC
AtAAP5	At1g44100	GCCTGCCGAAGTAAACACGATGAG	ACCCTCCATGAGCGAGGAGATTTC
AtAAP6	At5g49630	ACCAATTTTTCAGTTCGTAGAGAGCC	ACCAATCTGAGGAAGTTGATACTAAAATC
AtATG3	At5g61500	TCATCCACACTTGCCTGGTA	CCGAGATCAAAGTCCATTGTG
AtATG5	At5g17290	TAATCGCCCTGTTGAGTTCC	TCGACCCATCTGCTTCTTCT
AtATG8b	At4g04620	TTGGCCAATTTGTGTACGTT	TCCACCAAATGTGTTCTCTCC
AtATG8c	At1g62040	TGAGTGCCGAAAAGGCTATC	ACCAAACCAAAGGTGTTCTCT
AtATG8e	At2g45170	TCTTTAAGATGGACAACGATTTC	CTCAGCCTTTTCCACAATCA
AtATG8f	At4g16520	TGGGGCAGTTTGTGTATG	GGAACCCATCATCATCCTTTT
AtATG8g	At3g60640	GGAGCGATGATGTCAACCA	AGCAAGTTCACGGACAAGAA
AtATG9	At2g31260	TTGGTGGTCCAAAACACTCA	GCAAACATGGCCTACACCTT
AtATG10	At3g07525	TGGAGAACCTCTTGCTTTGG	ACTTTGGGAAAGCAGCTTGA
AtATG12a	At1g54210	TGCTTGCTTTGTTGGAAAGA	CTTTTGTTTAGCCGACGGA
AtNBR1	At4g24690	CCACTGGCGCTCATTCAAAG	ACACGACGAGGATGCTTGTT
AtGLN1;1	At5g37600	GCAATCGATAAATTGGGACTGAGACAC	TGGCCTCCTGTCCTCAAAGTATCC
AtGLU1	At5g04140	TGGAAAGGGAATGGCTGGTGGT	CCTTCAACTACTGCTTCAGCGAGTGAG
AtNIA1	At1g77760	CTCCTCTCGTTCCTTCTCCTCG	ACGGTGGTGATGACTTCGGTTTC
AtGAPDH	At1g13440	TTGGTGACAACAGGTCAAGCA	AAACTTGTCGCTCAATGCAATC
CsATG1e	CSS0042370	TAGTCGGTGGTGGGCTTCG	ACAGTGGAGACCCGCAAA
CsATG5	CSS0031022	AGTACCGCACATTAAACC	TTCACCTTCACAAGGGAT
CsATG7b	CSS0049485	GTCAGGAAATGAACATGG	AAGGTGCATAGAAACCAG
CsATG8a	CSS0047563	GGCCAAAAGCTCCTTCA	GCCCGACAGTCAAATCA
CsATG8b	CSS0012169	TGACAGTTGGGCAATTCG	TGGATGGACCCAAATGTG
CsATG8c	CSS0049783	TCCTTCAAGTTGGAACA	GCCCGACAGTCAAATCA
CsATG8d	CSS0028585	CTTCAAGATGGAACACCC	ACAGTCAGATCAGCAGGA
CsATG8e	CSS0008568	TCCTTCAAGTCGGAACA	CTGCCCAACAGTCAAAT
CsATG8f	CSS0029668	TATTTCAAGCAAGAGCA	AATTGTCCCACAGTCAG
CsATG8g	CSS0035066	CAGTAGGACAATTTGTGT	GGCTACAGTAAAATCTGGT
CsATG8h	CSS0033839	TCAAGCAAGAGCATGACT	CTTGTCGATGTTGGGAAT
CsATG8j	CSS0028099	TCCTTCAAGCAAGAACAT	CCTTTTACGAATCACATAC
CsATG8k	CSS0013524	CAAACAGGAGTTTTCATTCGAG	TTTCCCAGGAGCCAGACG
CsATG9a	CSS0019197	GTCCTGGTAGTGAAAGTCC	TCTCGCAATAGTAGCTGTA
CsATG11	CSS0046771	TCCGGGTACTTGCTGATA	CTTCTTTGCCTGCTTCTC
CsATG13	CSS0024224	ATTTGCAGGGTAATGTTC	TTATCTAAAGCAGGAGGAC
CsATG16a	CSS0041467	GAAGTGAAGGTGCTGAAT	CTGTCCTCCACTAACCAA
CsATG18b	CSS0018567	CGAATCAGTCATCCTCCTC	TTCATAACAAAGCCTCCC
CsATG18e	CSS0049303	GATGAACCTCTTCCCAATA	TGCTGATACCTCCGTGAT
CsATG18f	CSS0026650	CCTGAGCAGATATACTTC	GGGAGTTTGAAGATAGTC
CsATG18g	CSS0021708	GCTGCTGGTATAATGAATC	ACTGGTATGAGCCCTAAA
CsATG18i	CSS0024395	TCAAGACTCCGGTTGTTT	TGATGATCGTCCCAAATC
CsATG18k	CSS0017985	GGAAGATGCCTCCTCAAT	GGGTCGCAGTTGTAGATT
CsATG18o	CSS0010177	CCTGAGATATACTTCCAG	GGGAGTTTGAAGATAGTC
CsGAPDH	CSS0050274	TTGGCATCGTTGAGGGTCT	CAGTGGGAACACGGAAAGC
Primers for vectors construction
Primers name	Types	Primers sequences ( 5’→3’ )
CsATG8e-F/R	ORF cloing	TCGTTGTATCATCAATCG	AAGGGTTCAAACTGTCTC
CsATG8e-OE-F/R	Overexpression	gtTCTAGAatggccaagagctcct	ggCTCGAGTCAGATTGATCCAAAT
